# Supplementary material
Source: PubMed Central journal article supplement (PMC10874521)
Supplement: NIHMS1960926-supplement-Supplemental_Figures_1-22.pdf [file NIHMS1960926-supplement-Supplemental_Figures_1-22.pdf]

**A**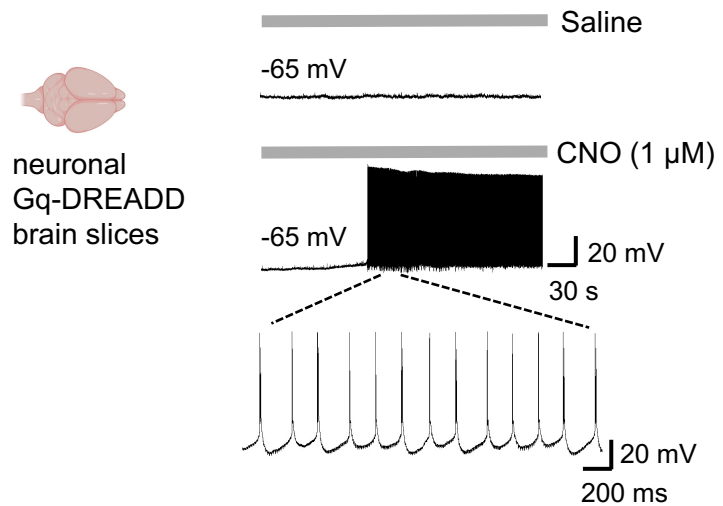**B**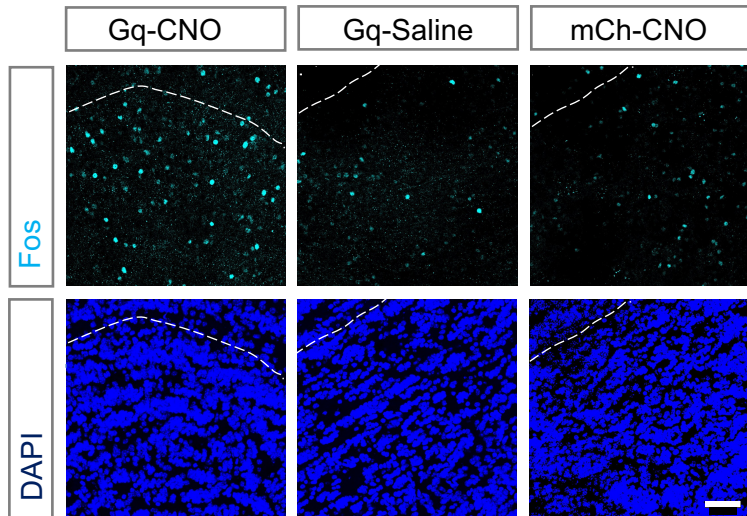**C**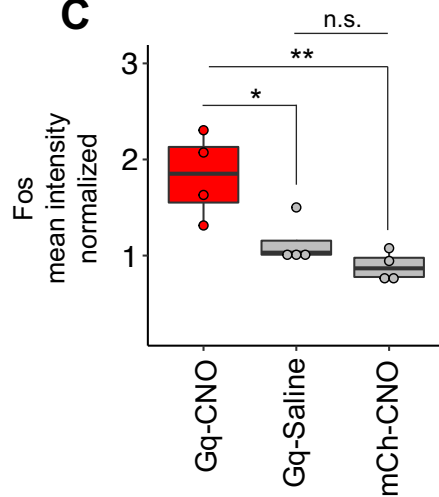**D**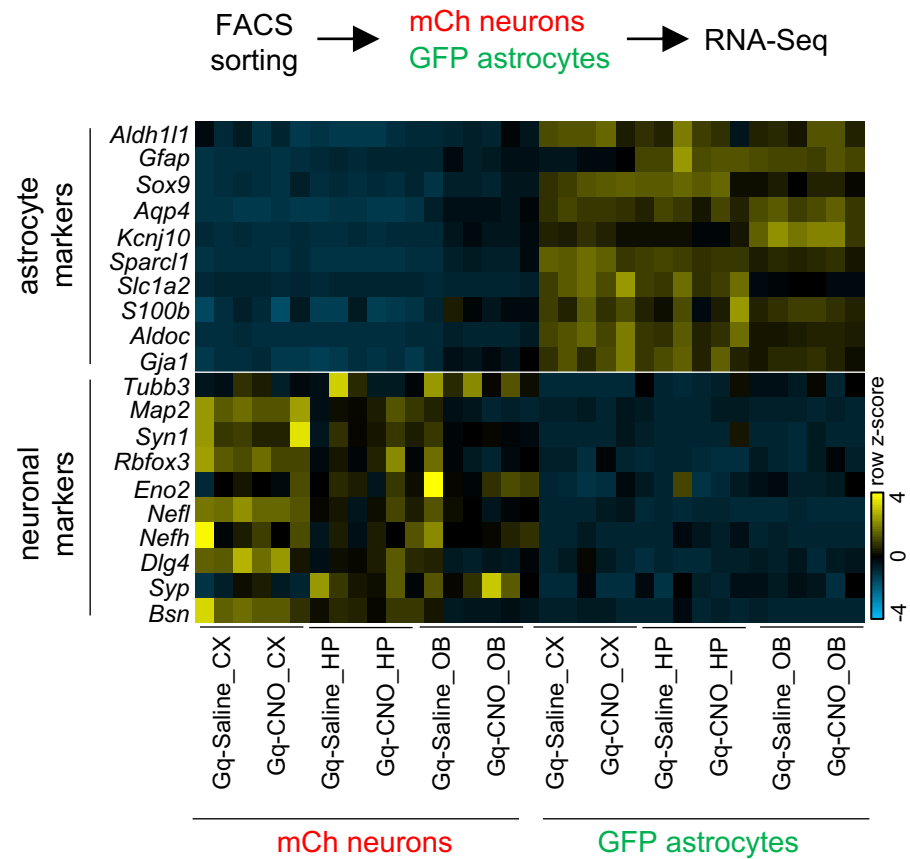

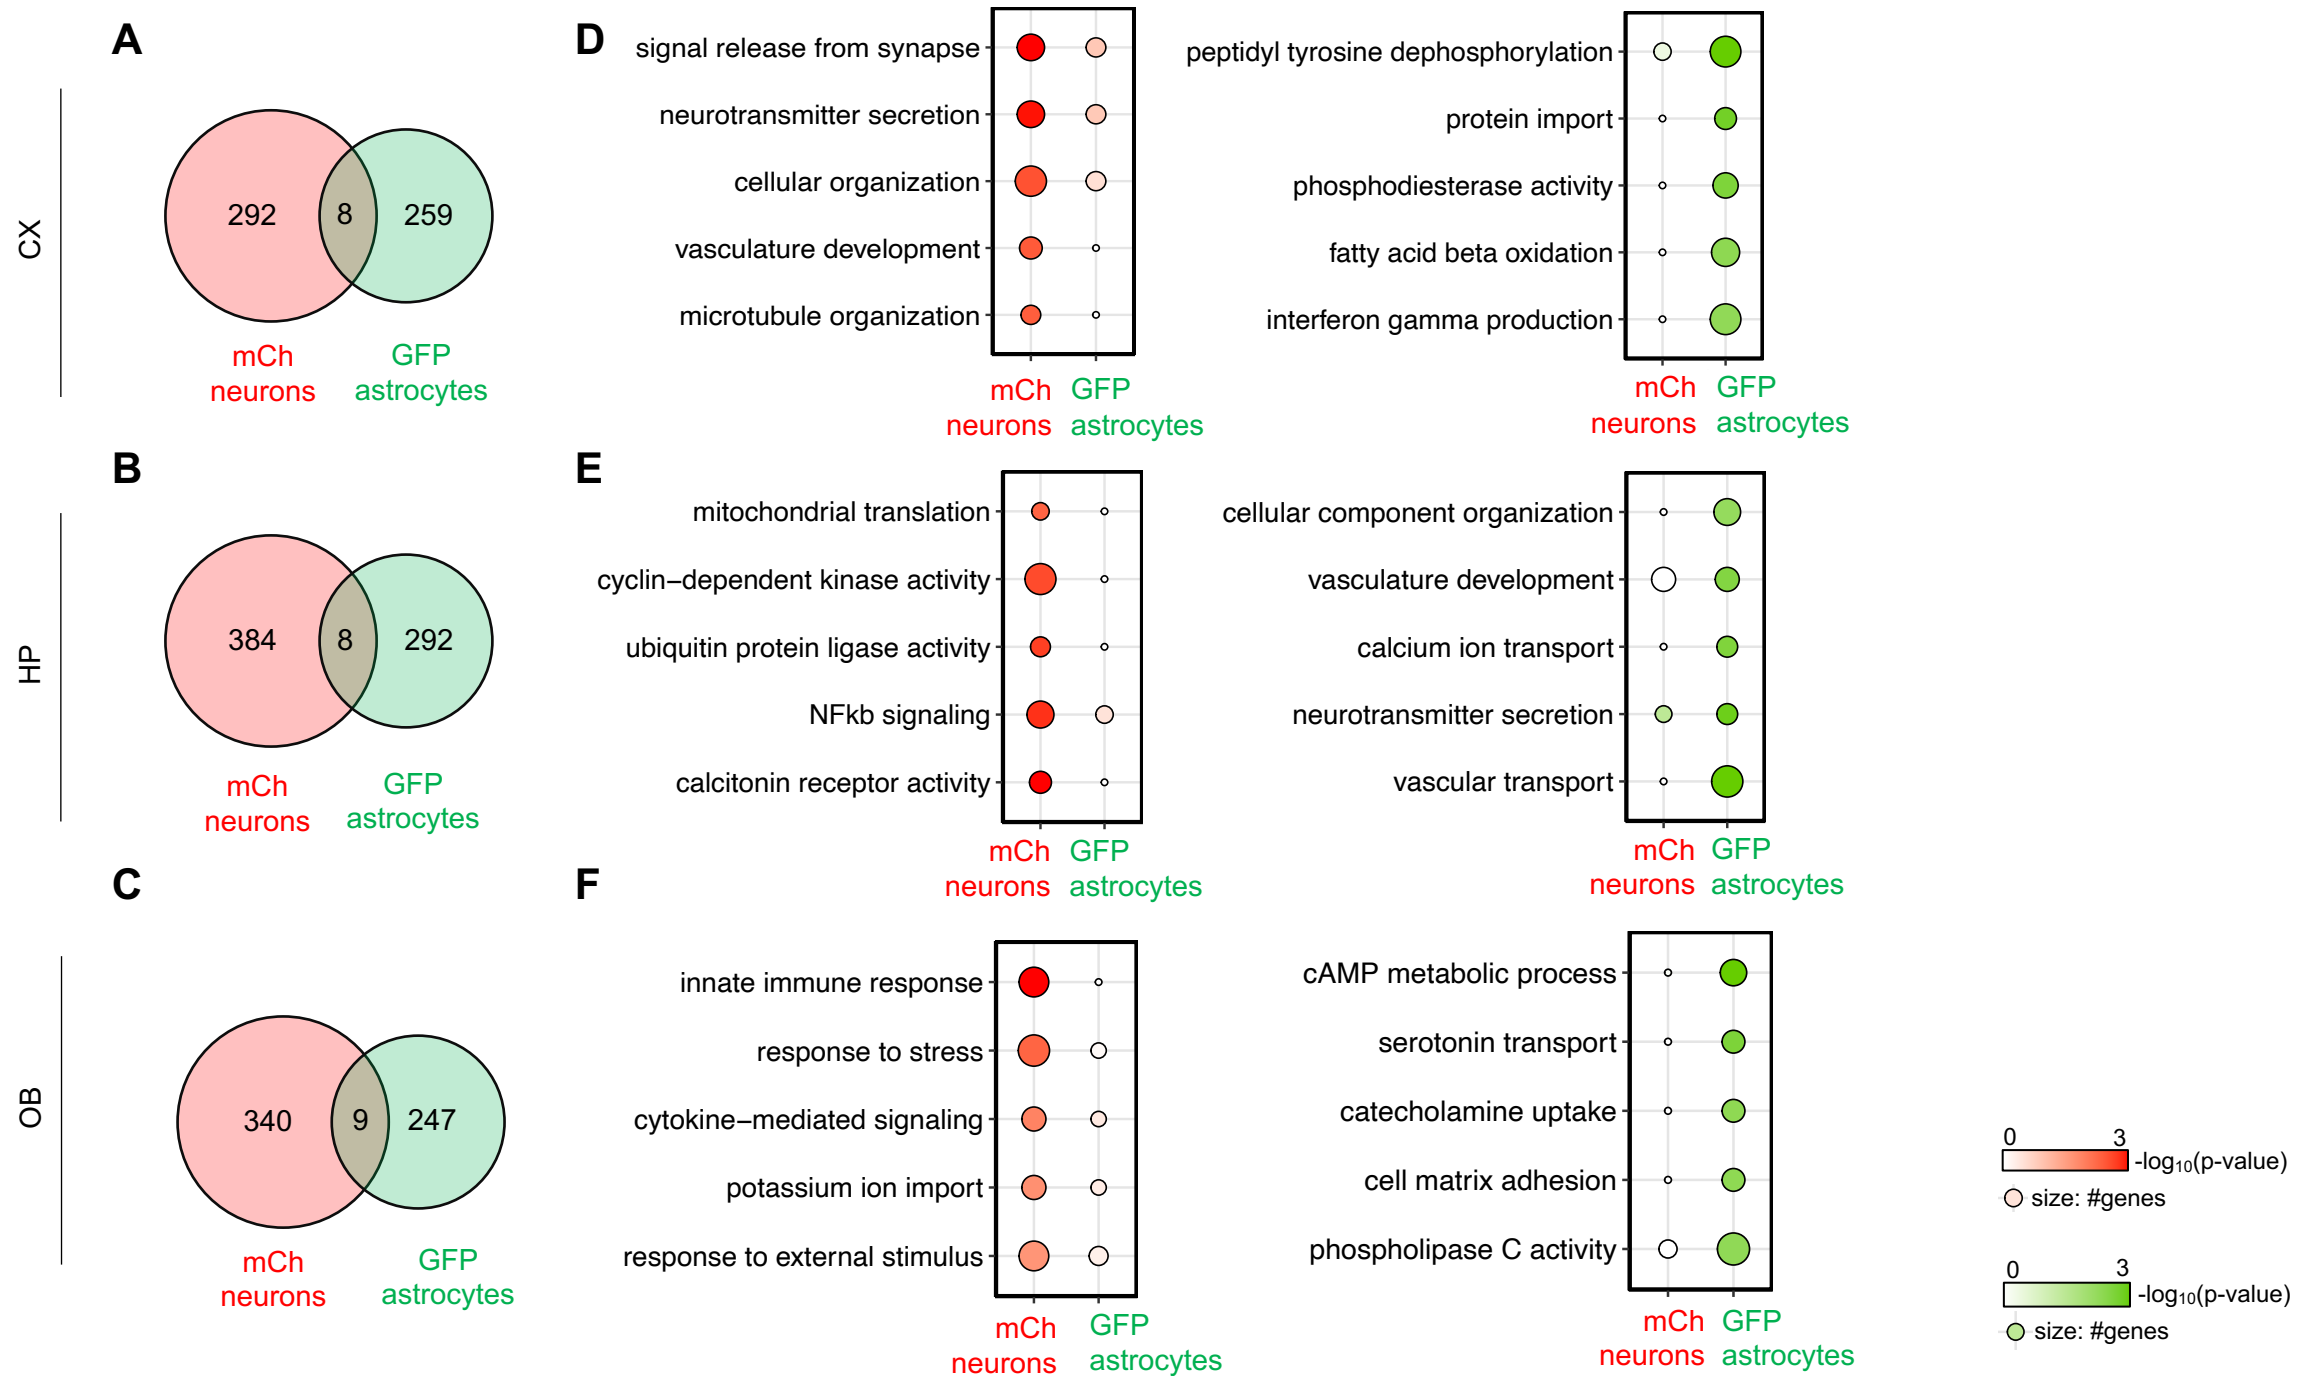

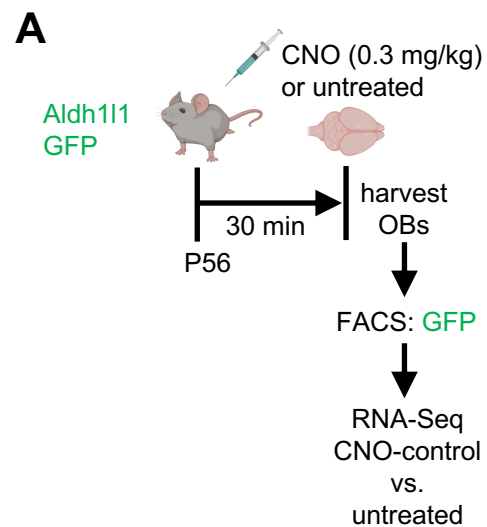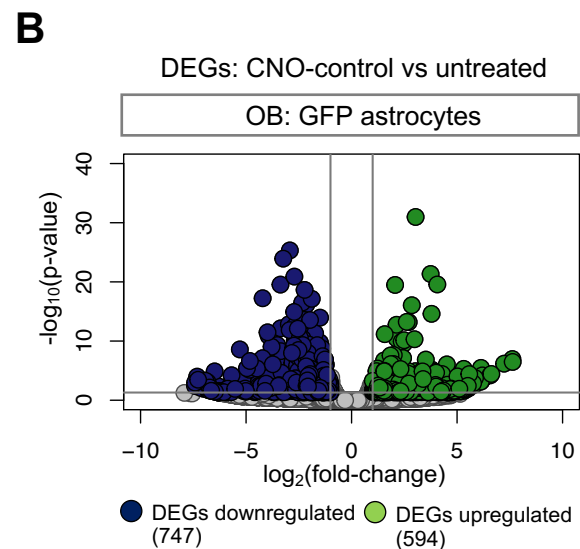

**C**

OB: GO terms compare with Supp Fig S2F

| GOID       | GO Term                                                                 | p-value |
|------------|-------------------------------------------------------------------------|---------|
| GO:0046058 | cAMP metabolic process                                                  | 0.2407  |
| GO:0006837 | serotonin transport                                                     | -       |
| GO:0090493 | catecholamine uptake                                                    | -       |
| GO:0098634 | cell-matrix adhesion mediator activity                                  | -       |
| GO:0007200 | phospholipase C-activating G protein-coupled receptor signaling pathway | 0.4619  |

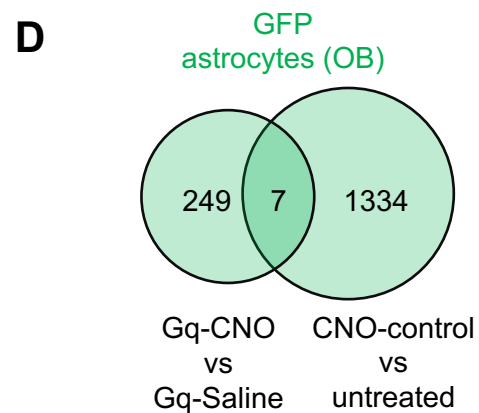

**E**

7 overlapping genes:

| Gene    | LFC    | p-value |
|---------|--------|---------|
| Ddx4    | 5.417  | 0.0102  |
| Gm20199 | 3.946  | 0.0011  |
| Rttn    | 2.079  | 0.0188  |
| Zfp568  | 2.498  | 0.0016  |
| Cd68    | -2.549 | 0.0332  |
| Gpr34   | -2.344 | 0.0017  |
| Hk2     | -2.395 | 0.0244  |

**A**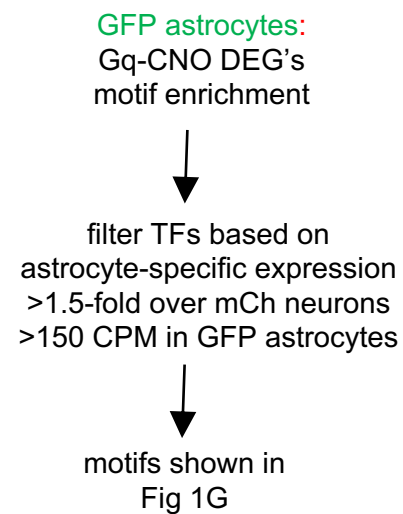**B**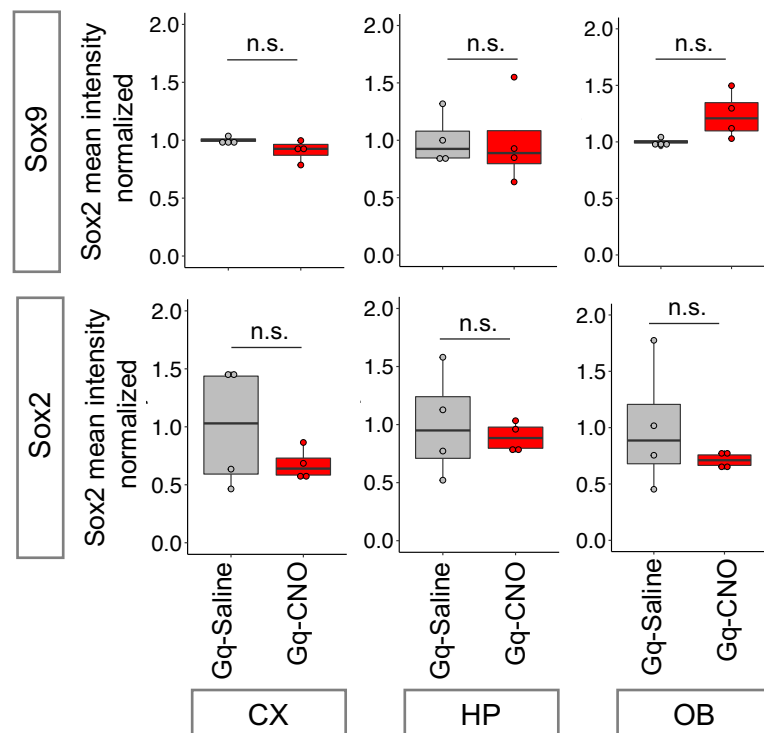**C**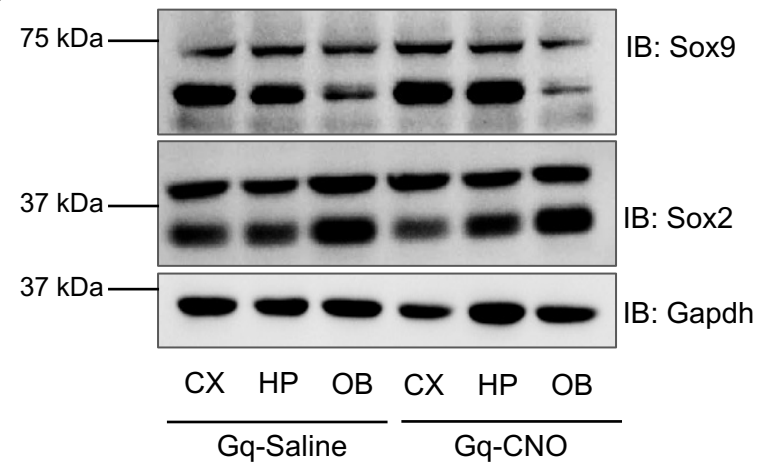**D**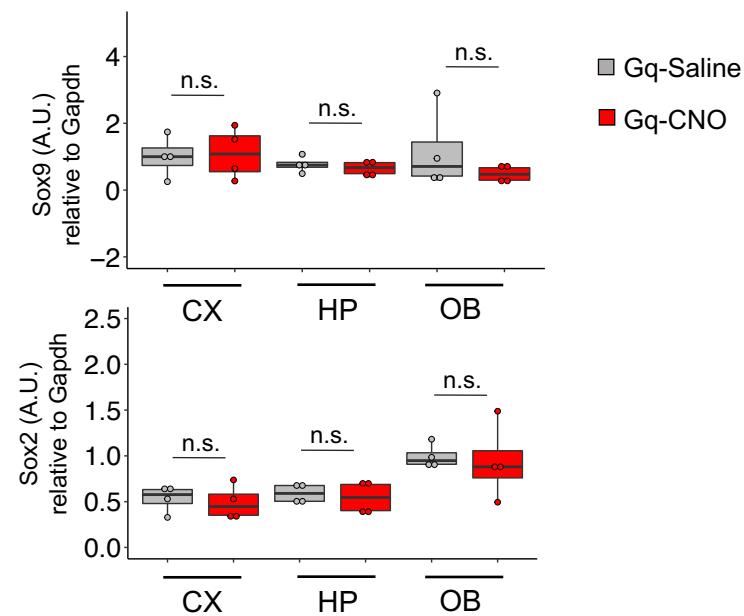

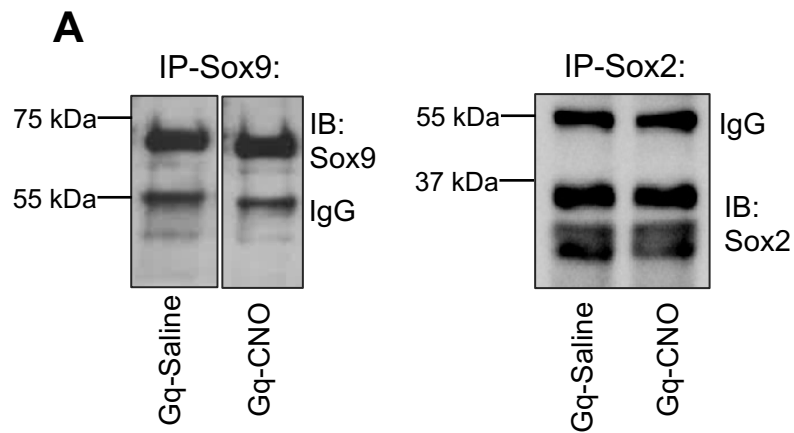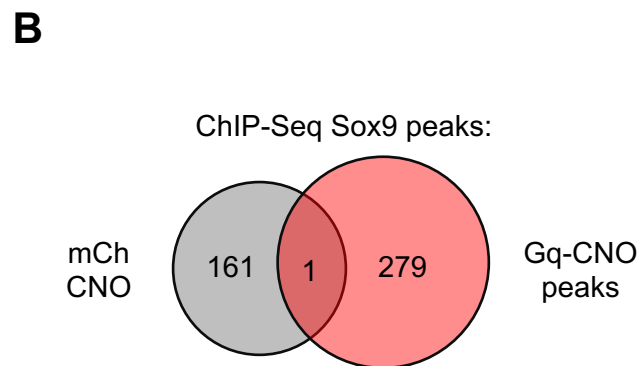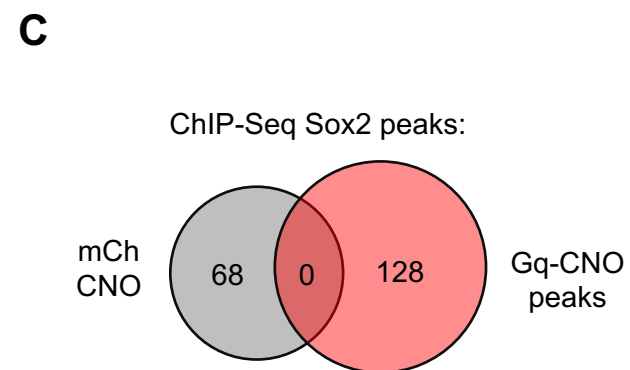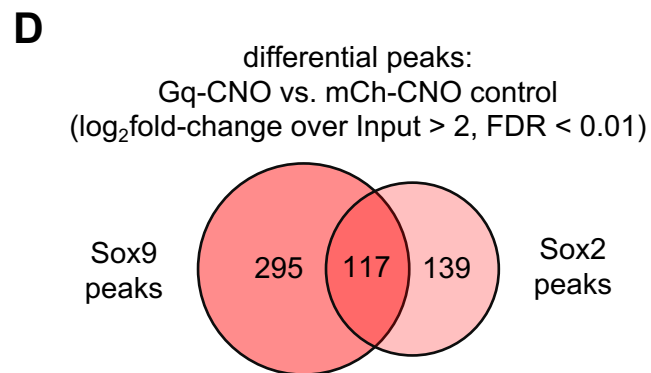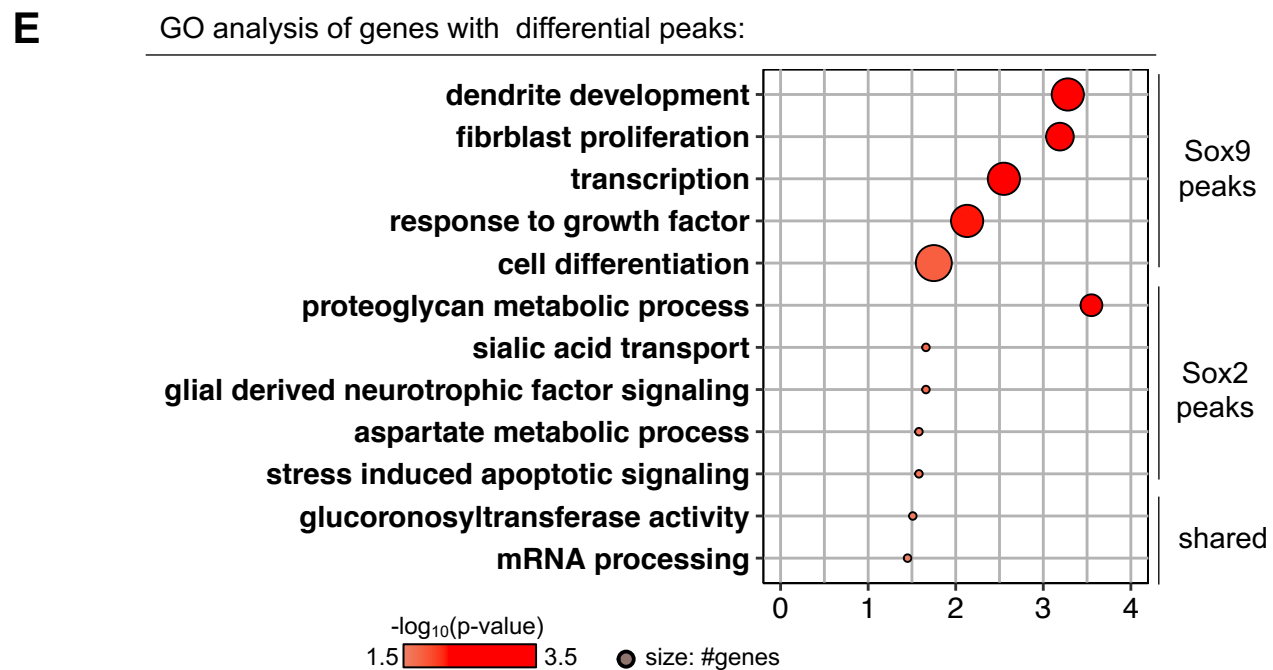

**A**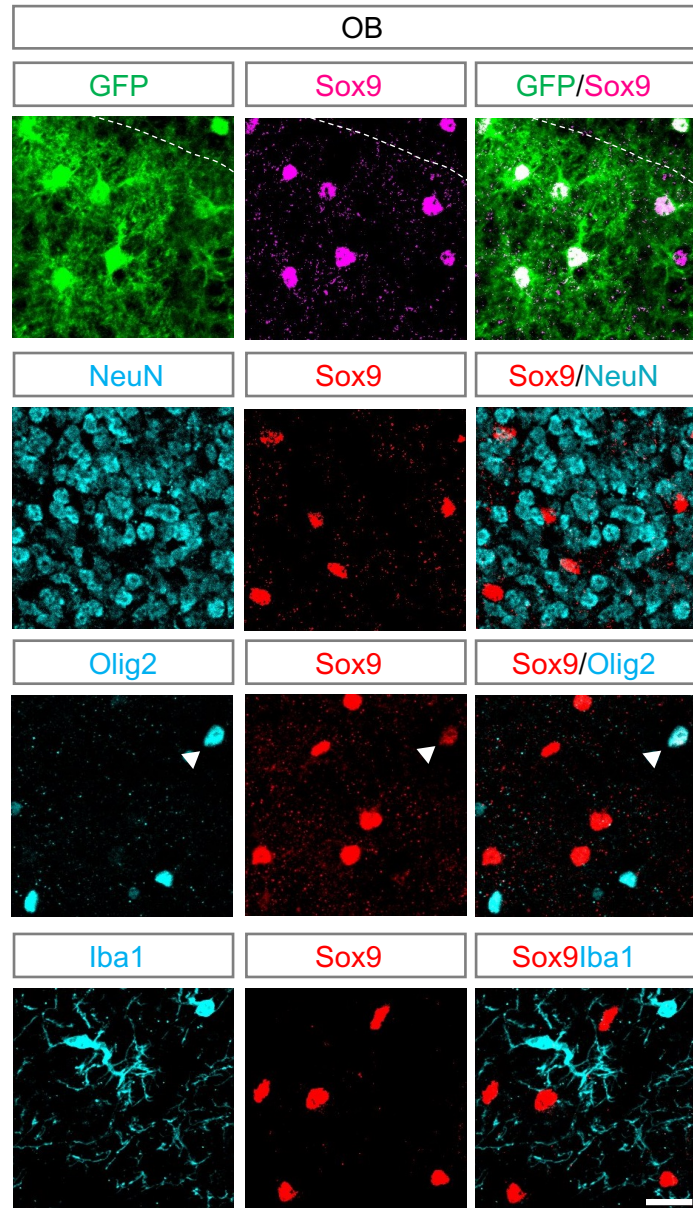**B**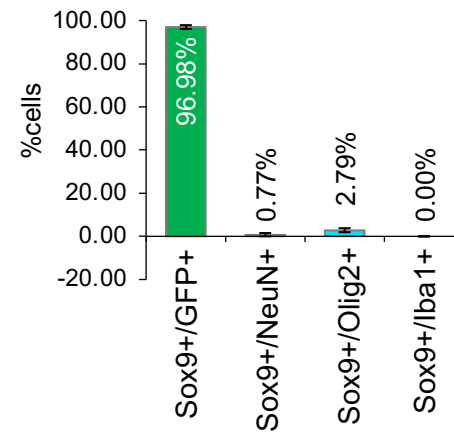**C**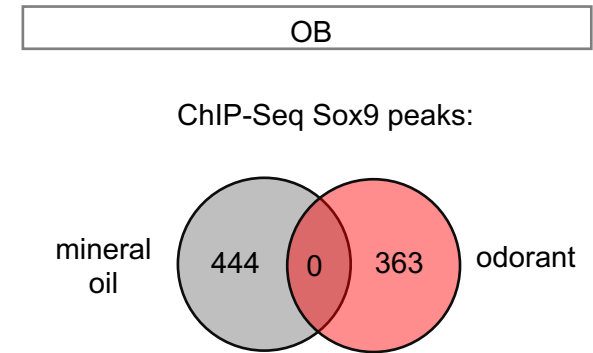**D**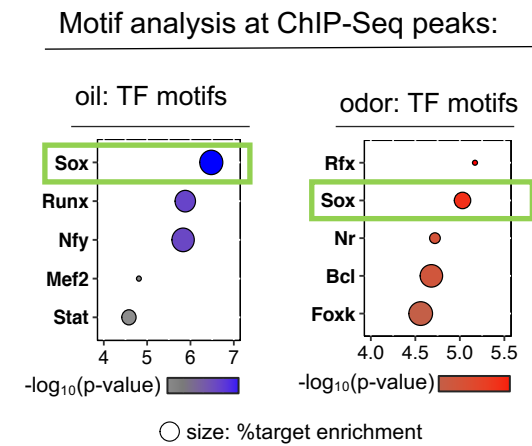

**A**

OB: Gq-CNO vs. Gq-Saline DEGs

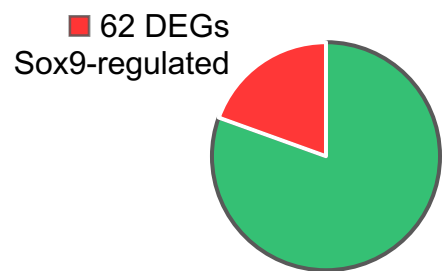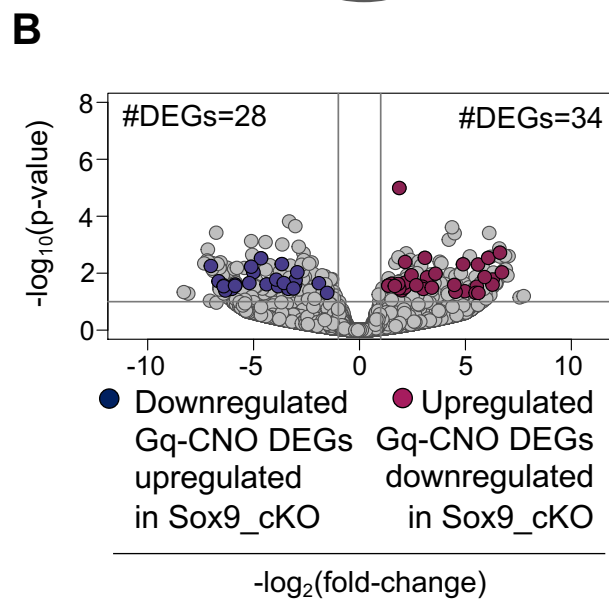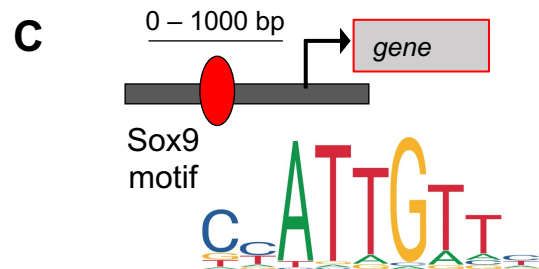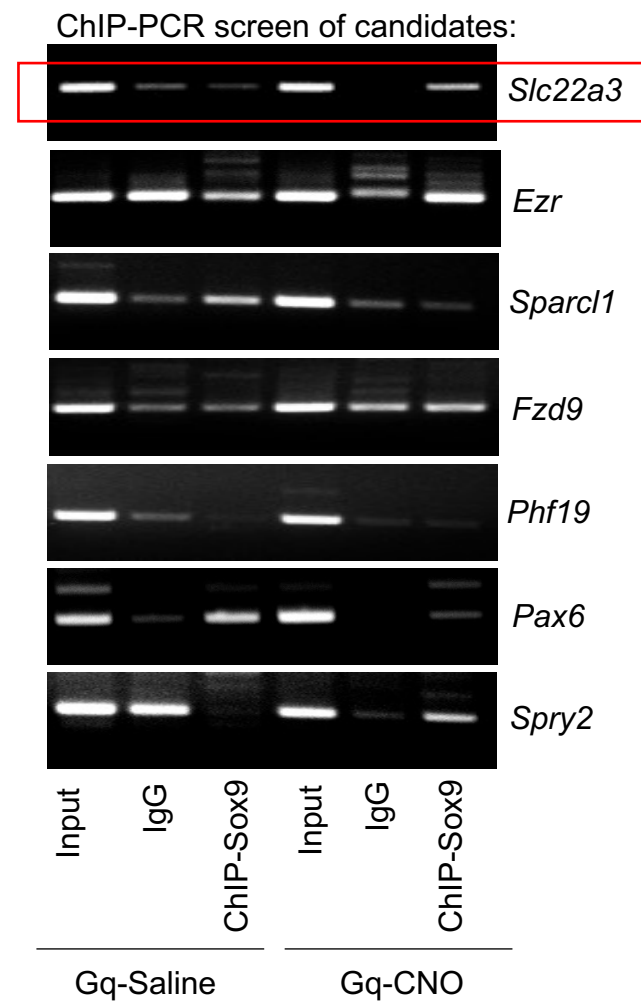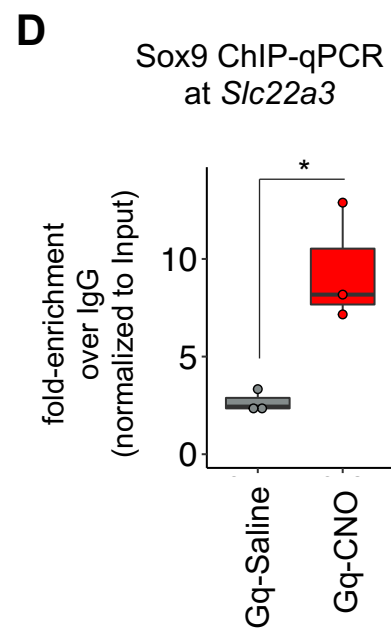

**A**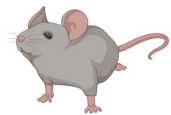

control: Sox9\_FF; Aldh111-GFP + tamoxifen  
 Sox9\_cKO: Sox9\_FF; Cag-CreER; Aldh111-GFP + tamoxifen

**B**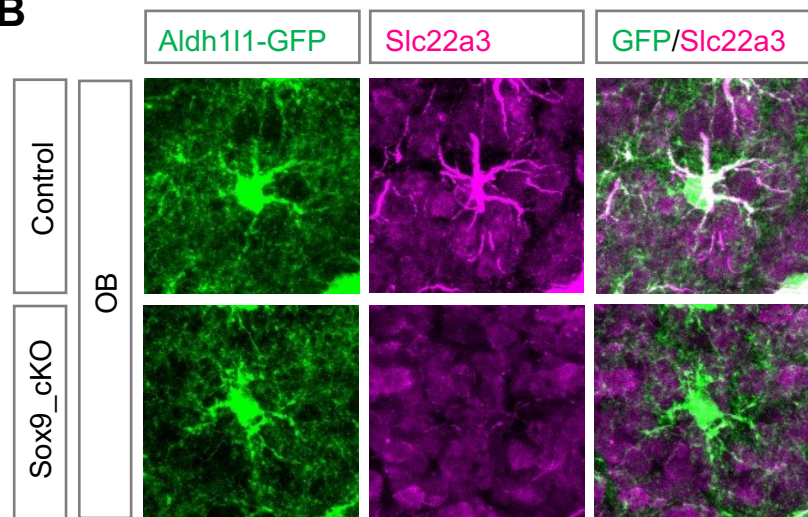**C**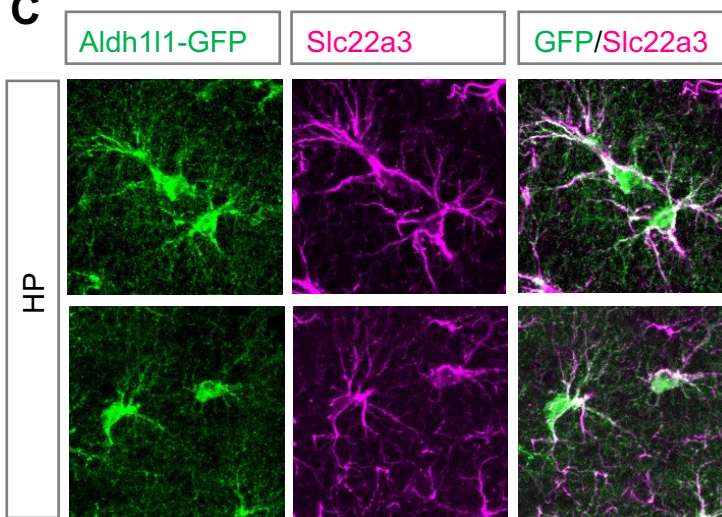**D**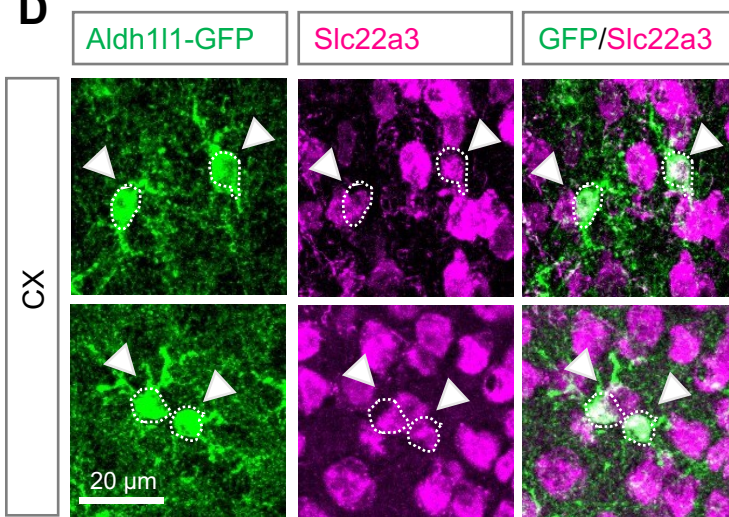**E**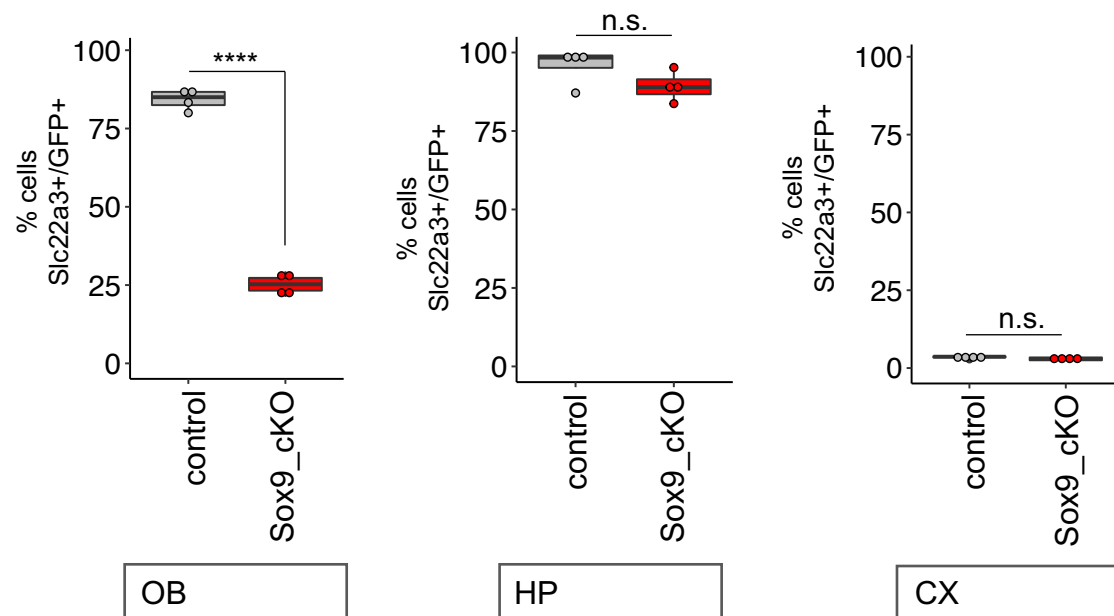



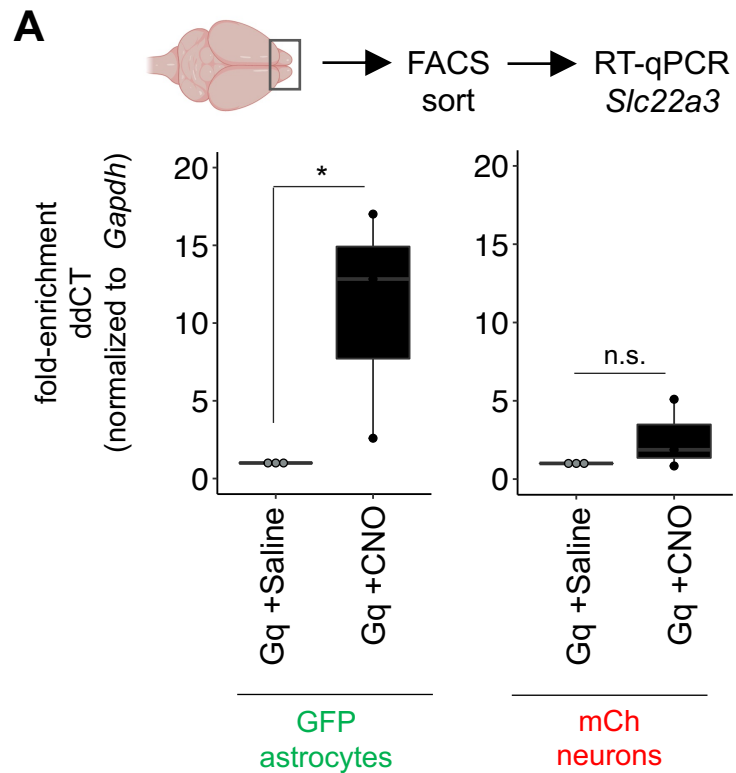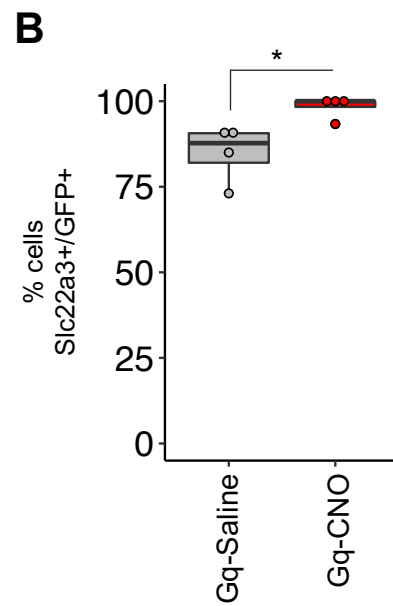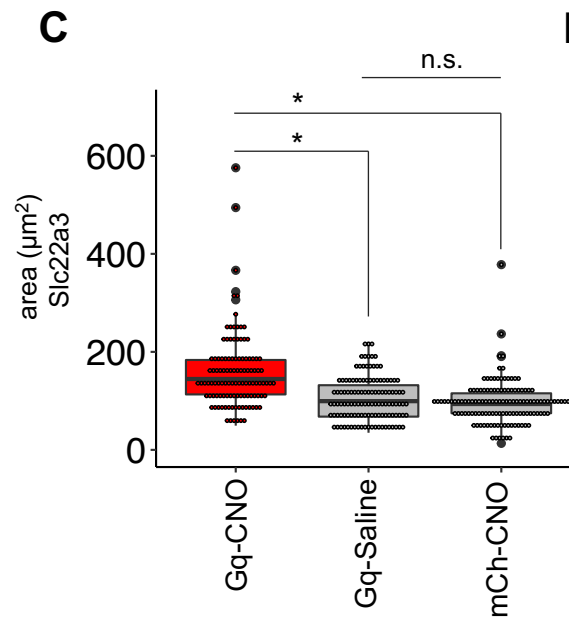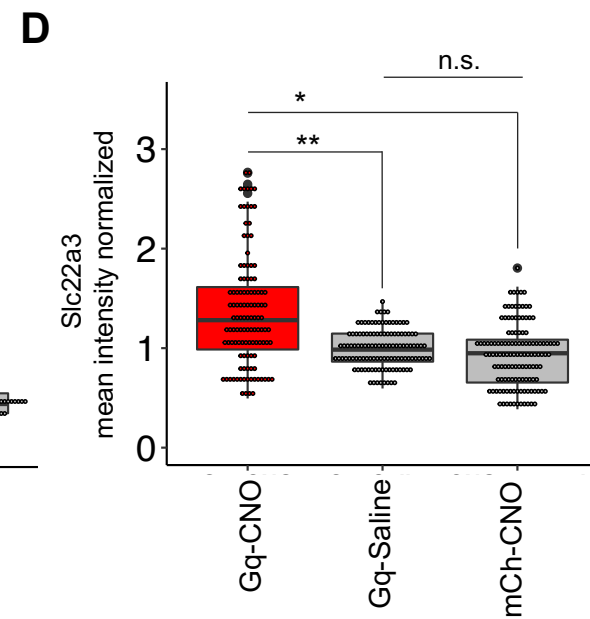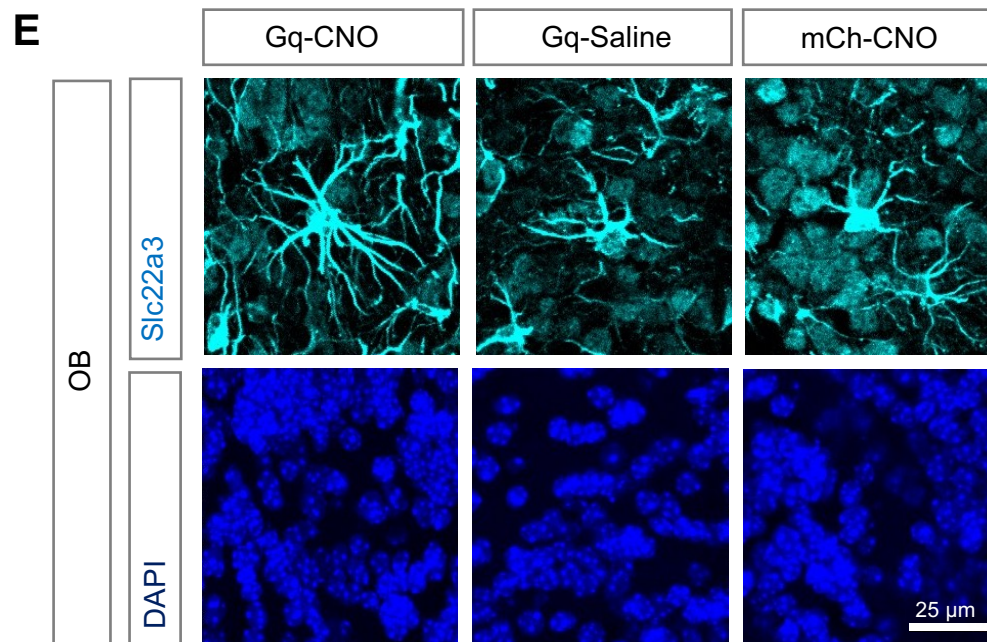

**A**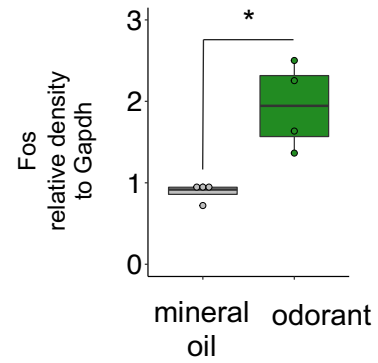**B**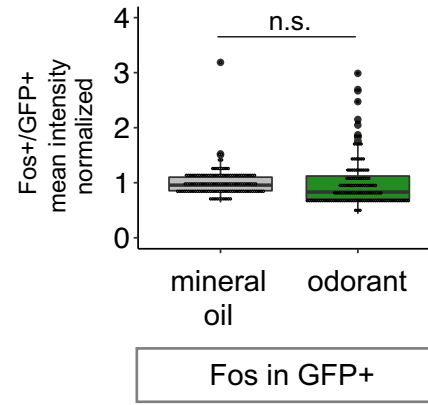**C**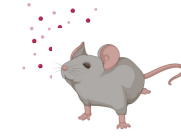

Aldh111-GFP

control: no habituation + no oil or odor  
 mineral oil: habituation + mineral oil  
 odorant: habituation + isoamyl acetate

**D**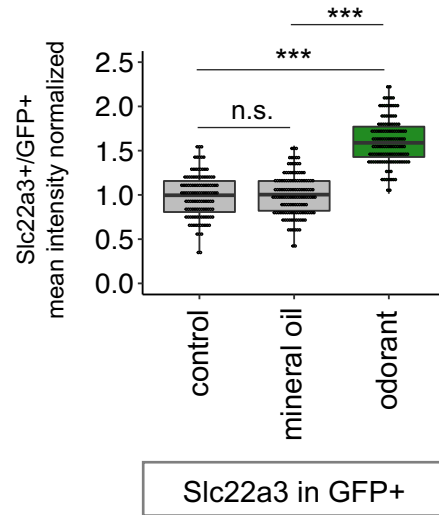**E**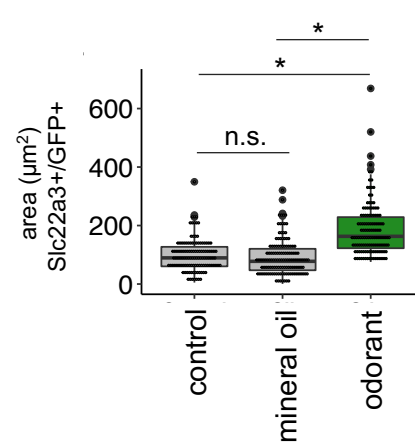**F**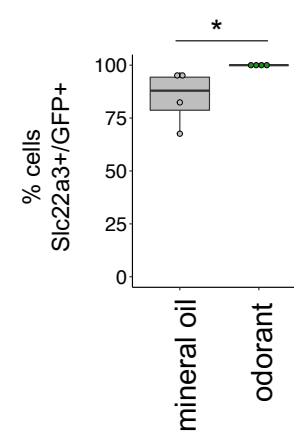**G**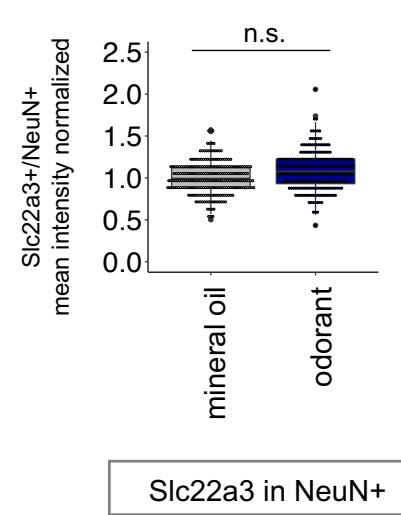

**A**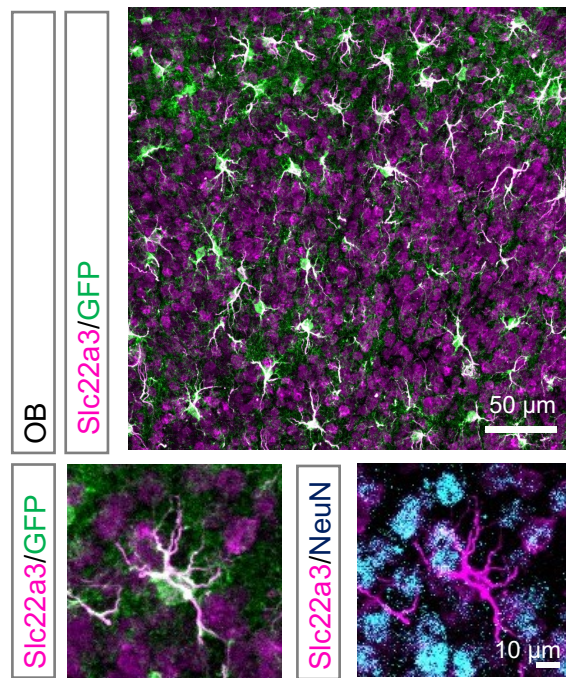**B**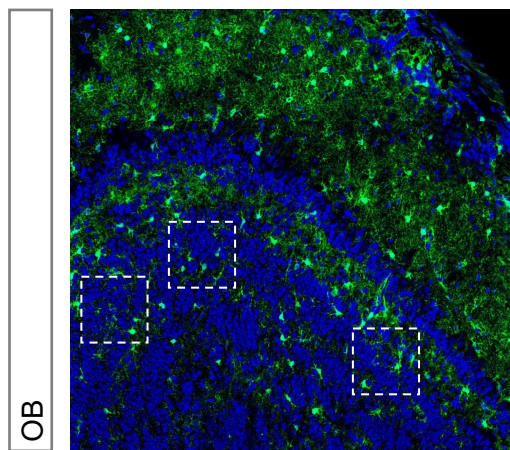**C**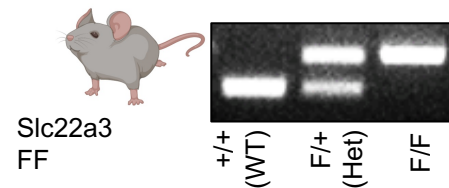**D**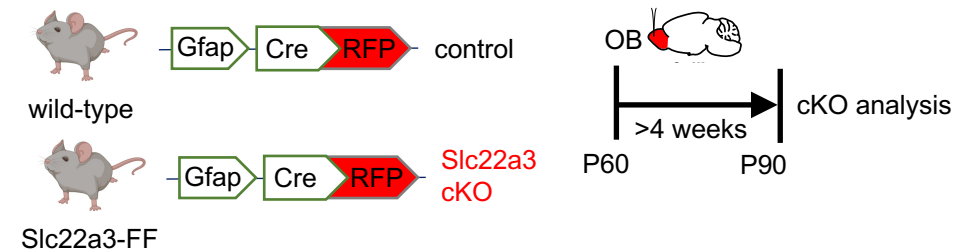**E**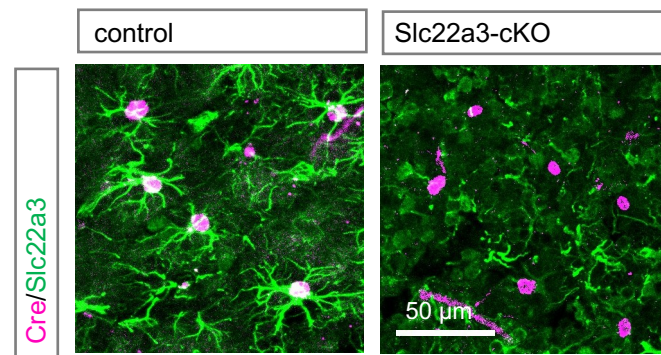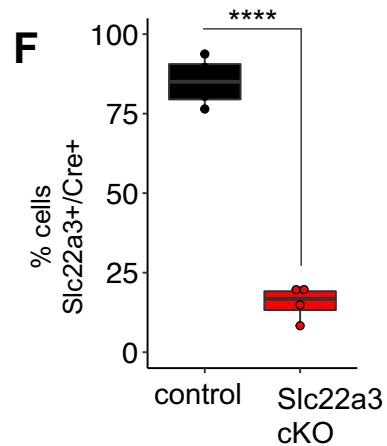**G**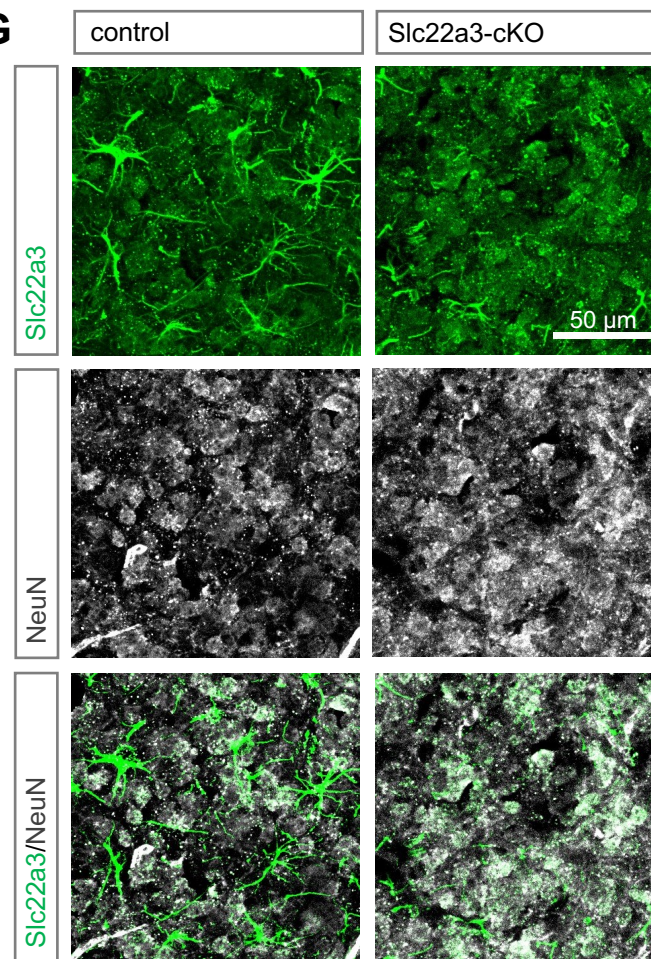**H**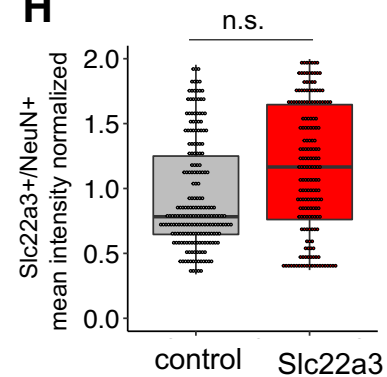**I**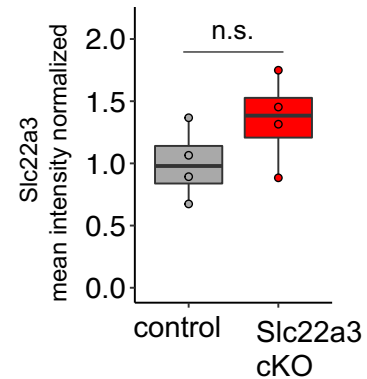

**A**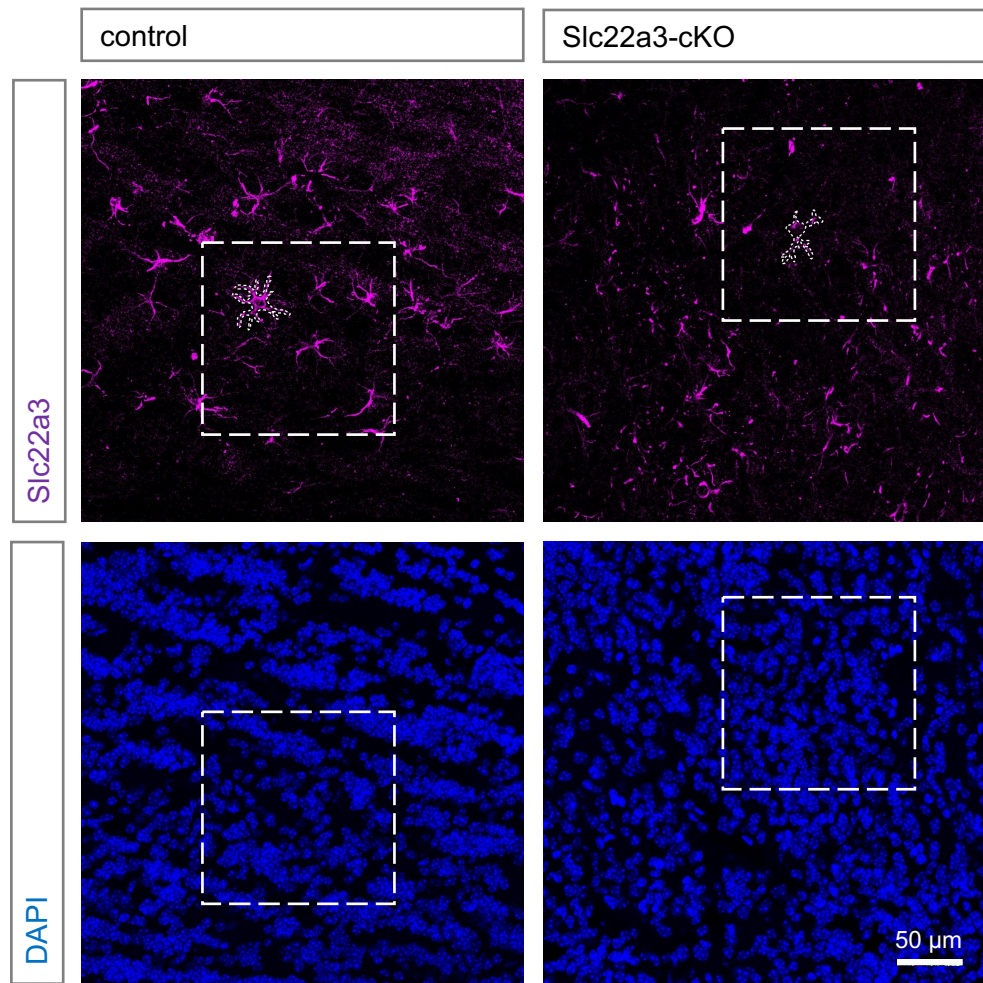**B**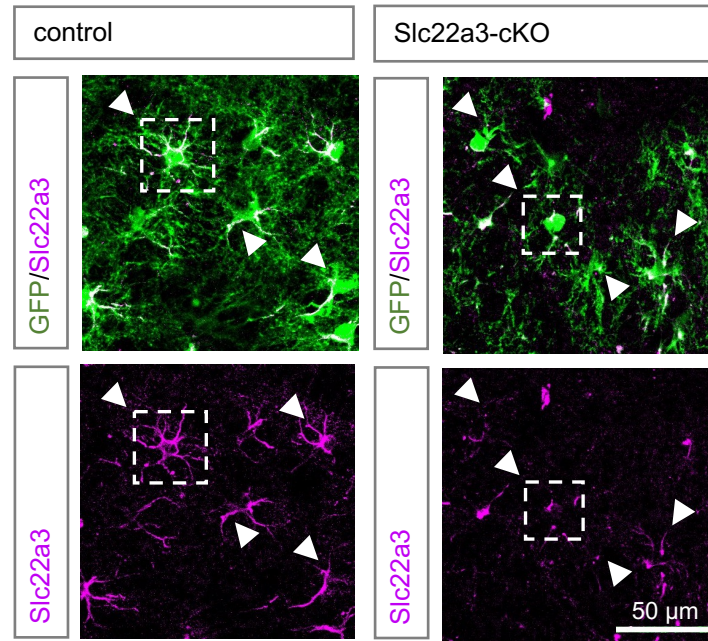**C**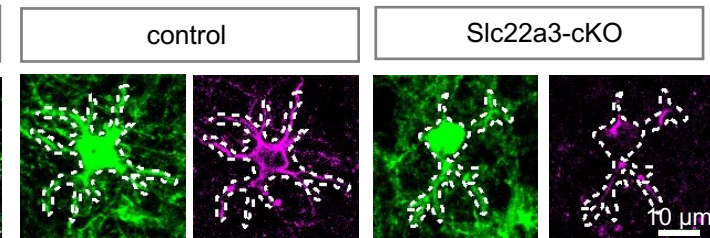**D**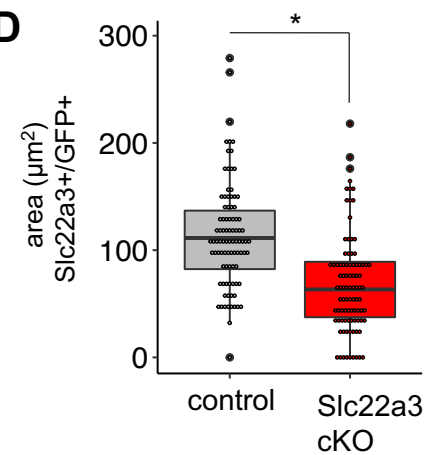**E**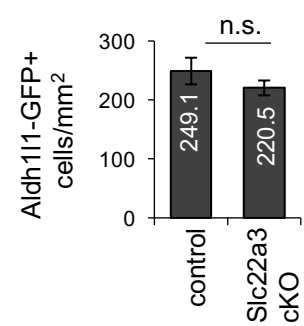**F**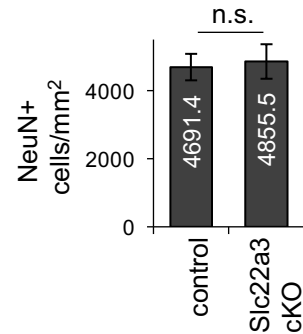

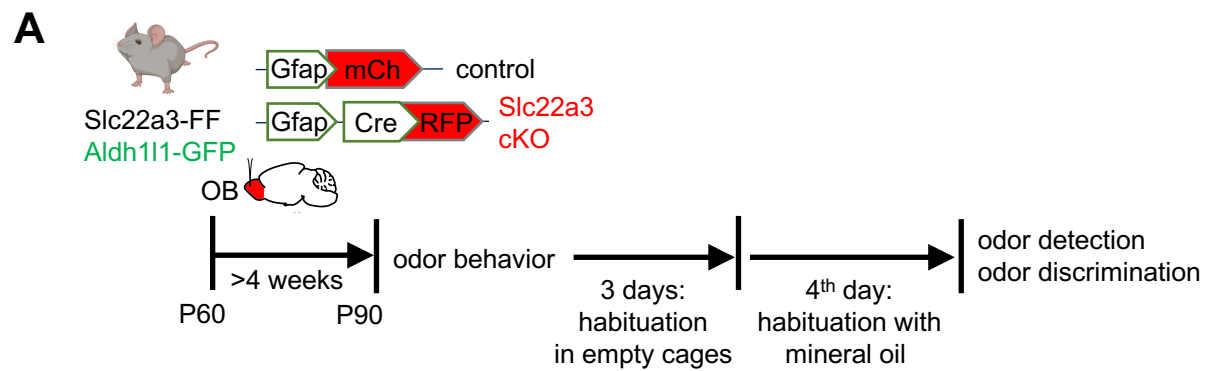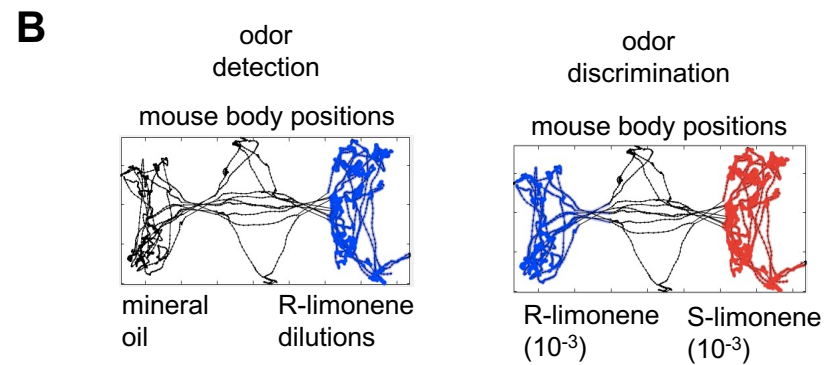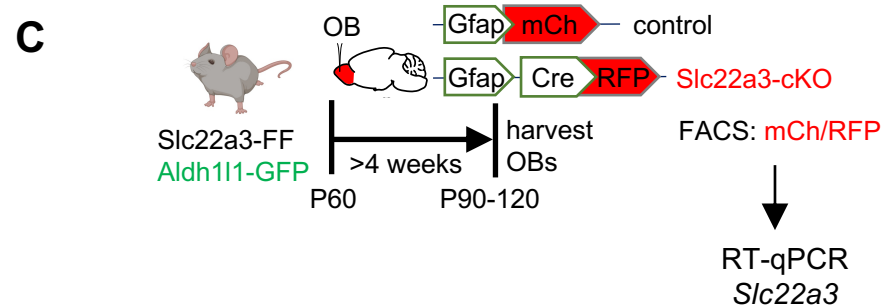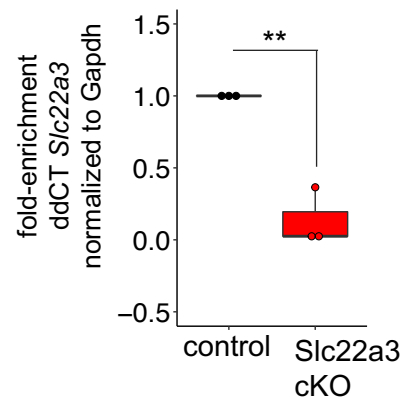

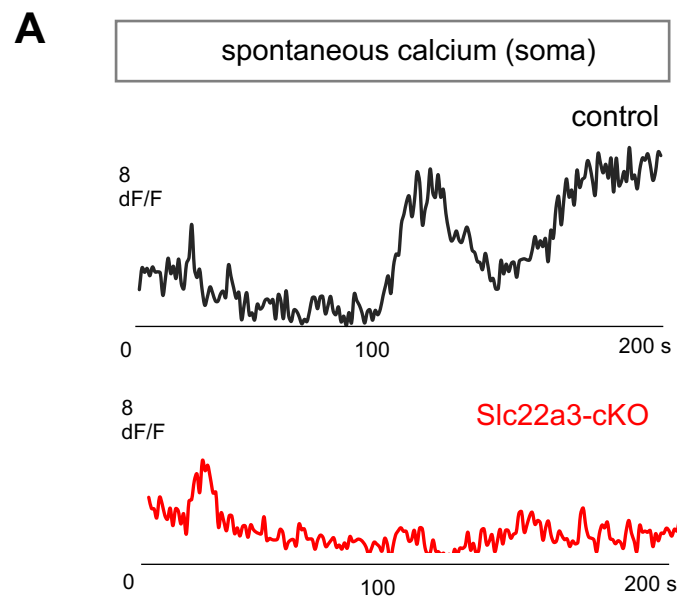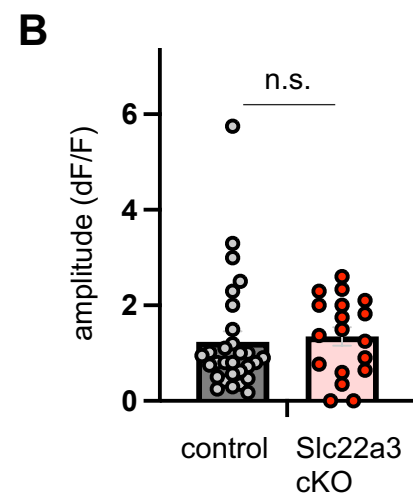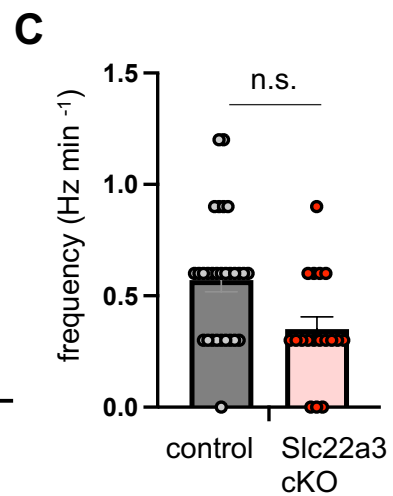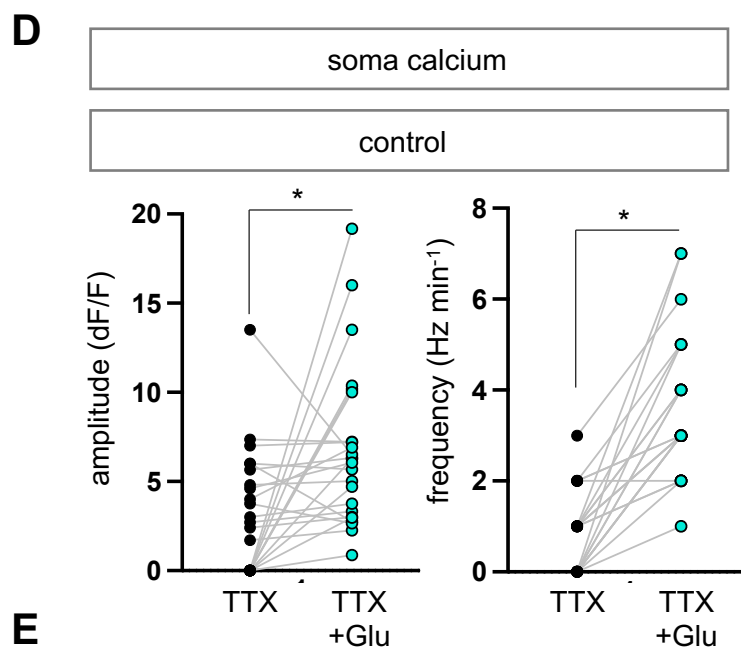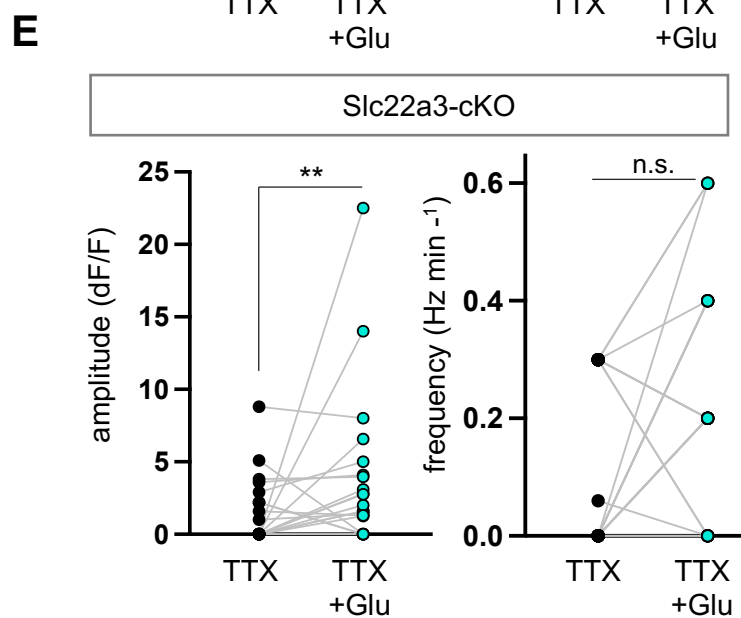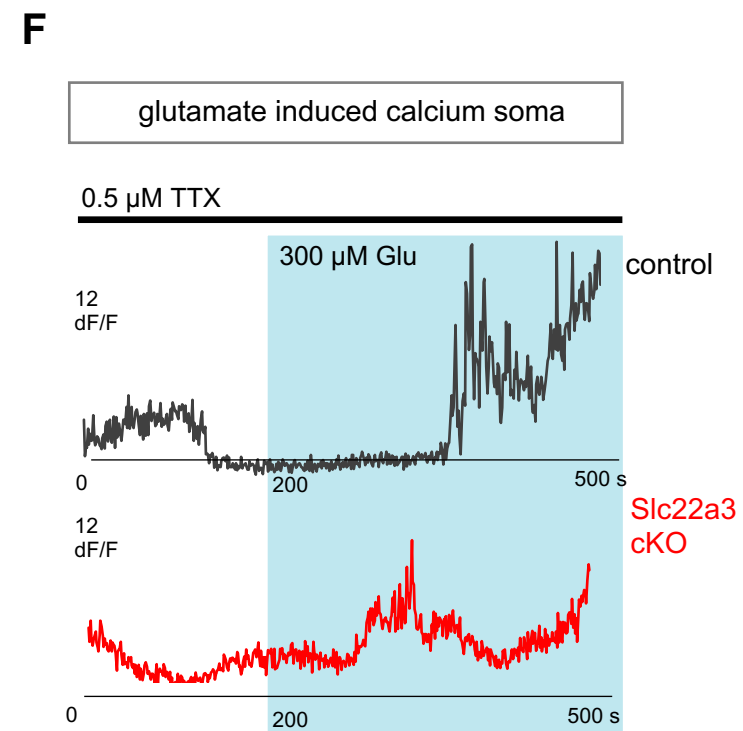

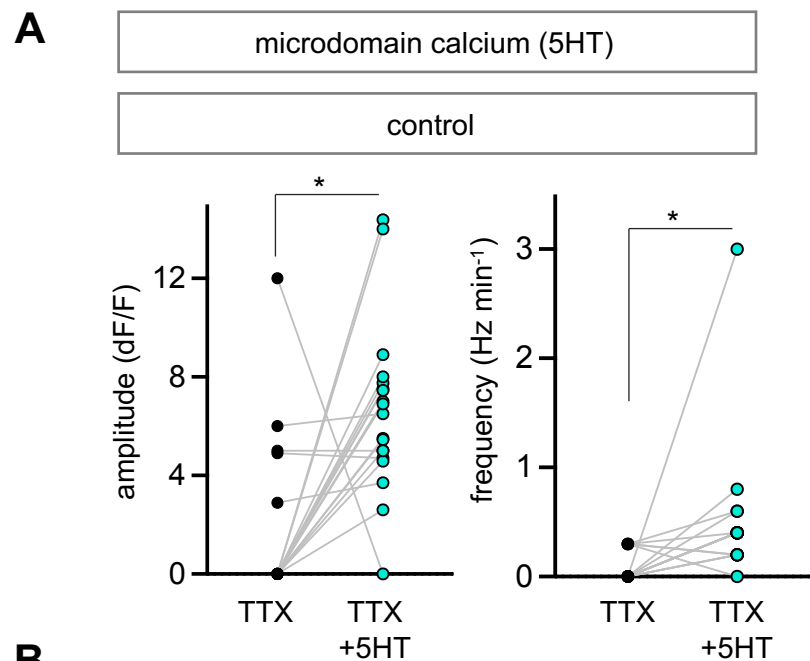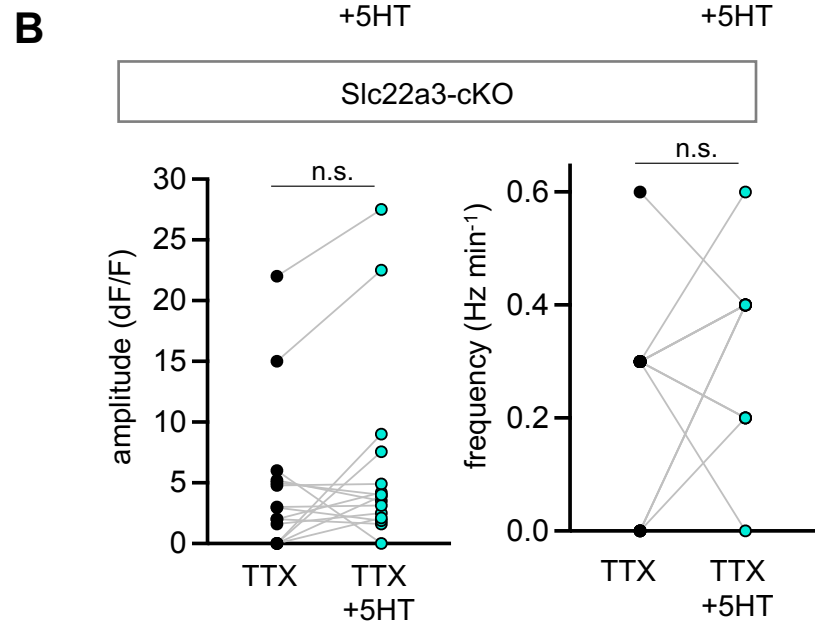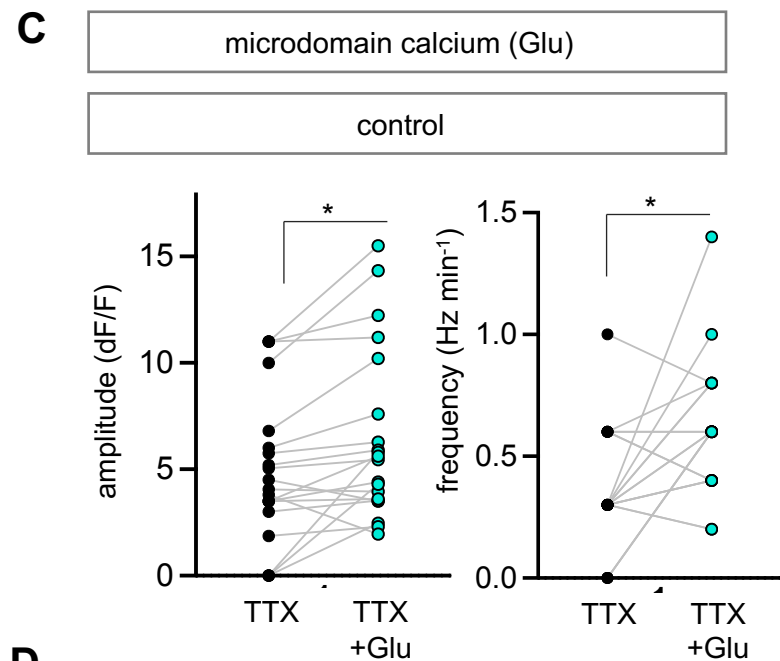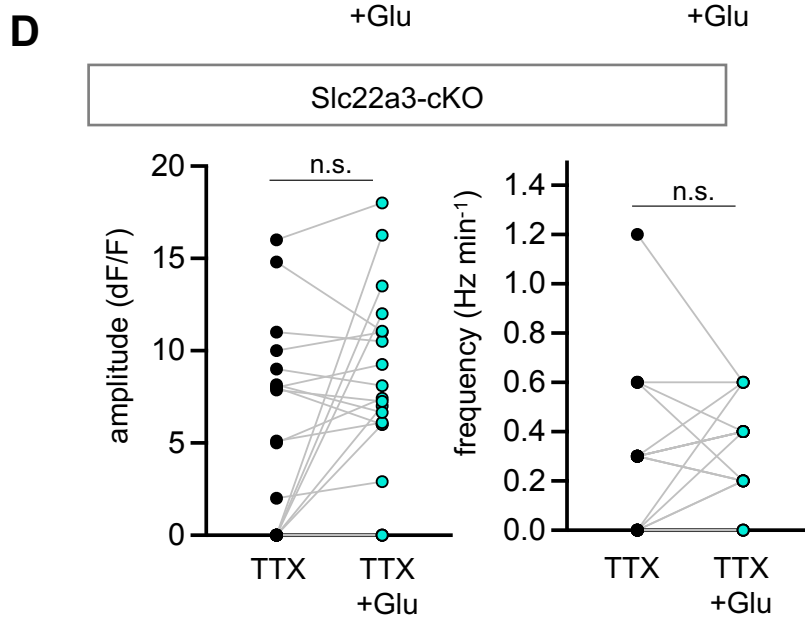

**A**

GFAP/5HT

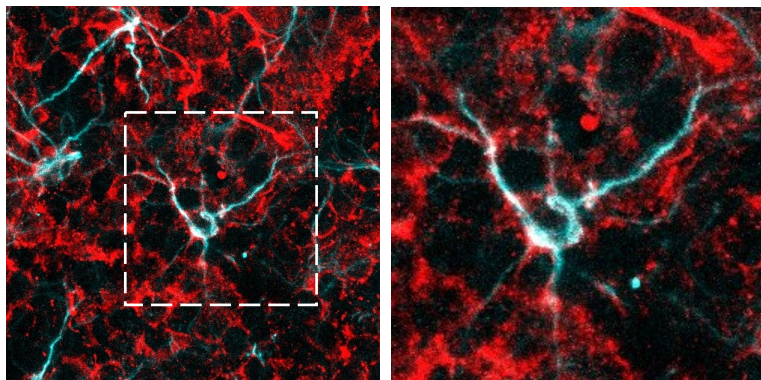

5HT

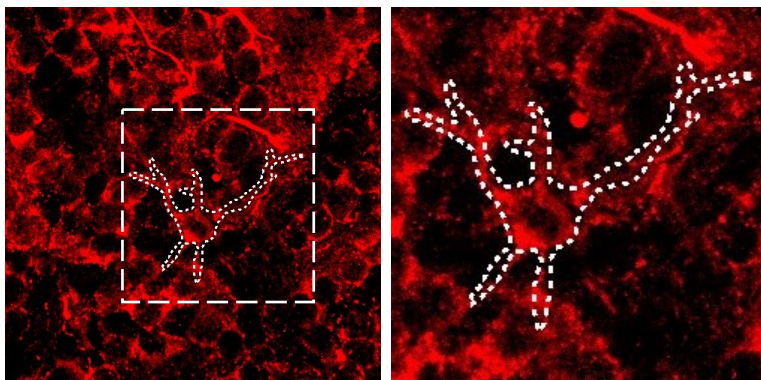

GFAP

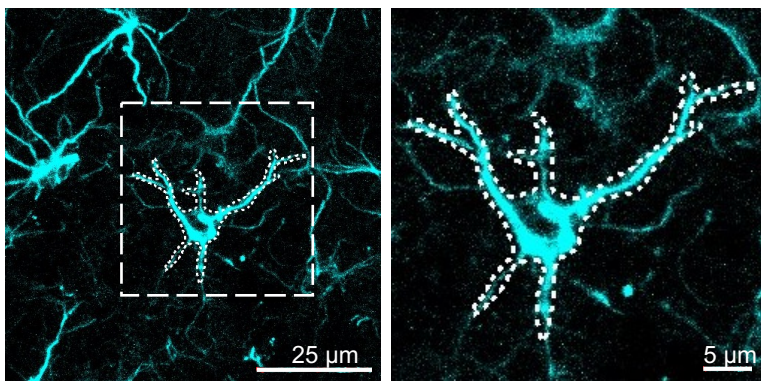**B**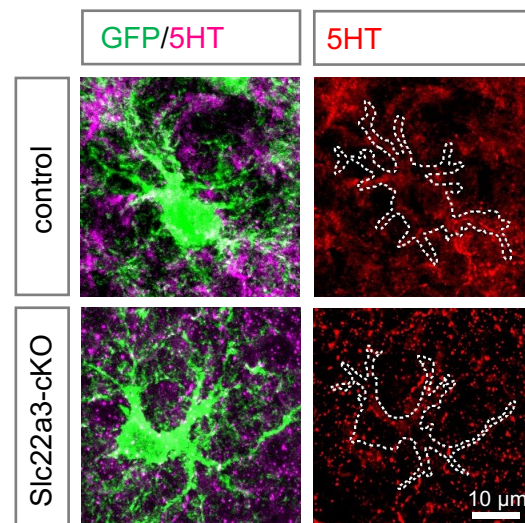**C**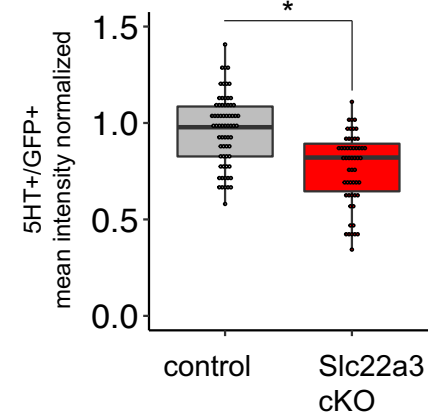



**A**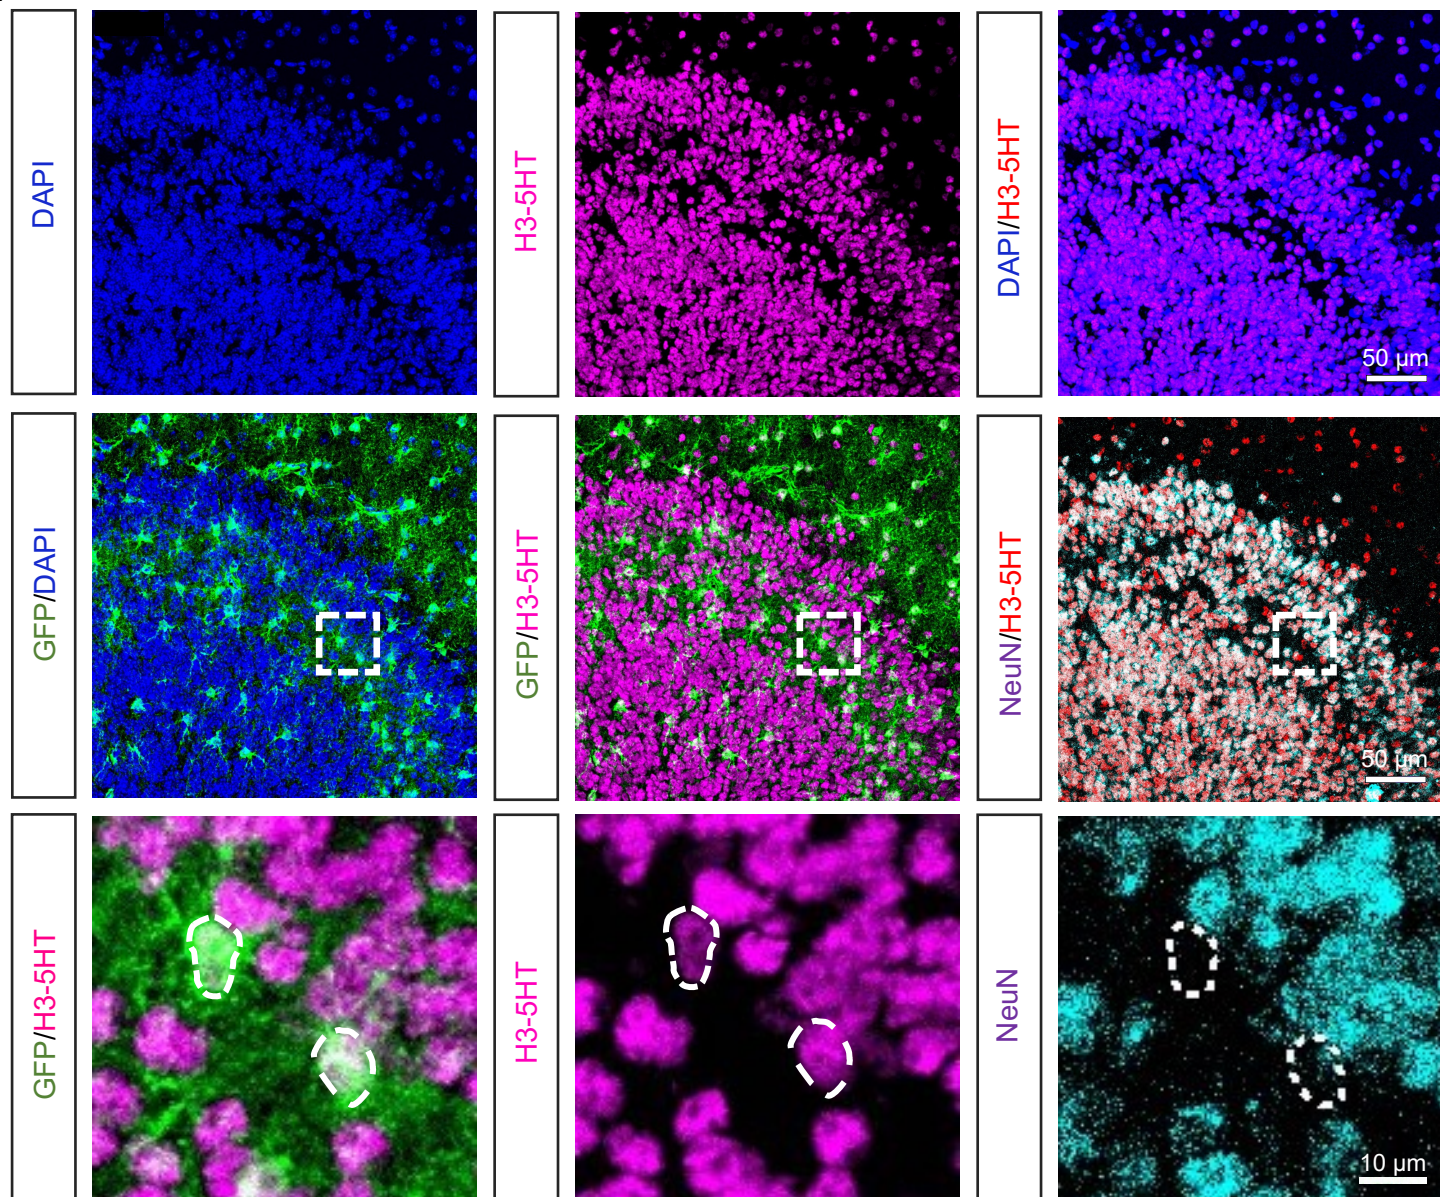**B**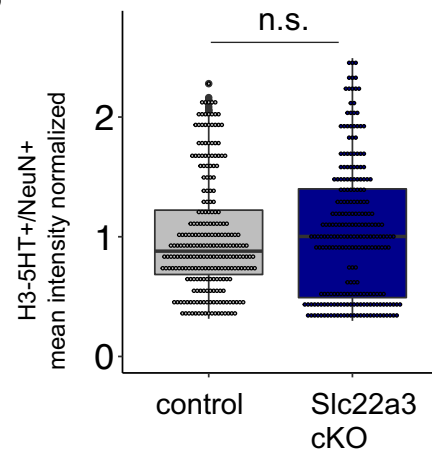**C**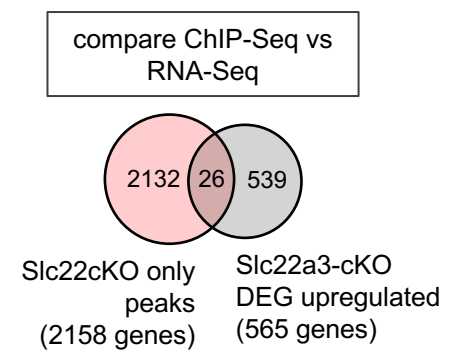**D**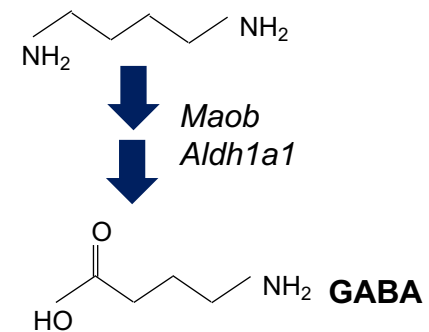

**A**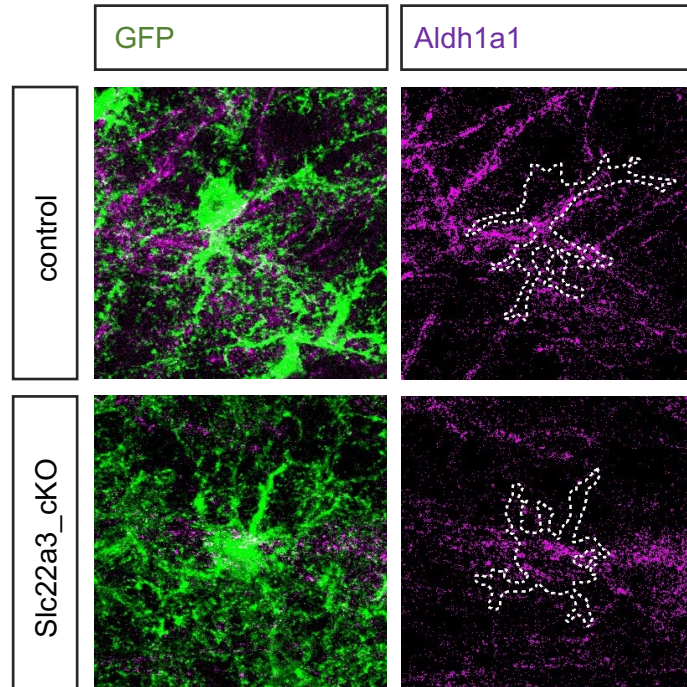**B**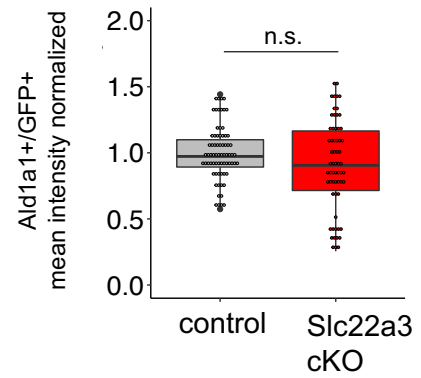**C**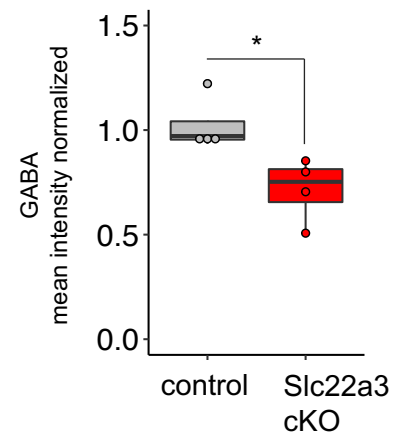**D**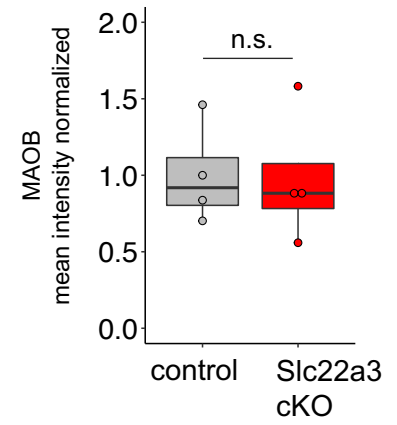

**A**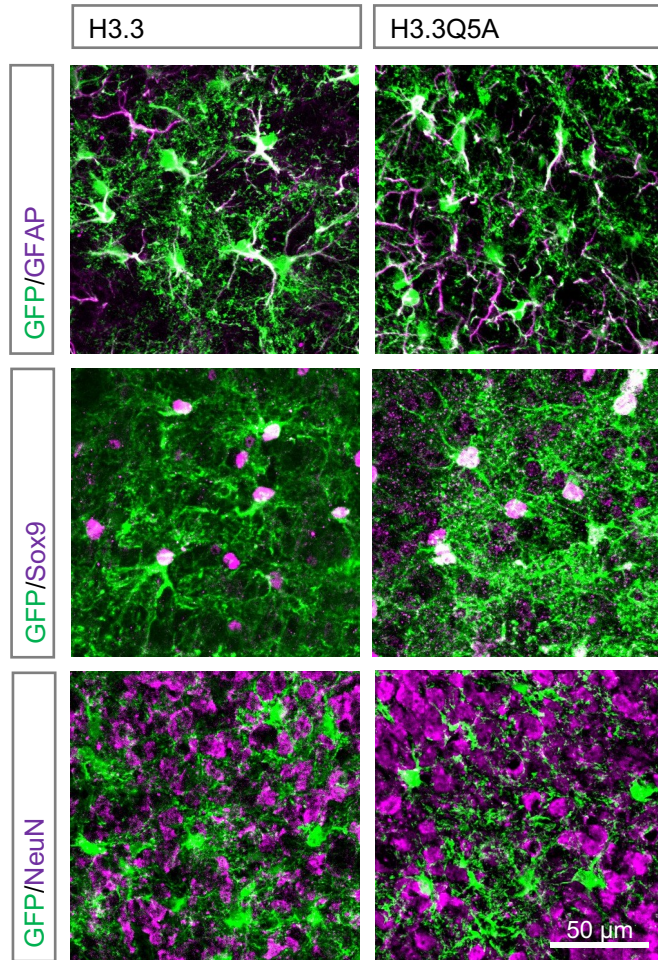**B**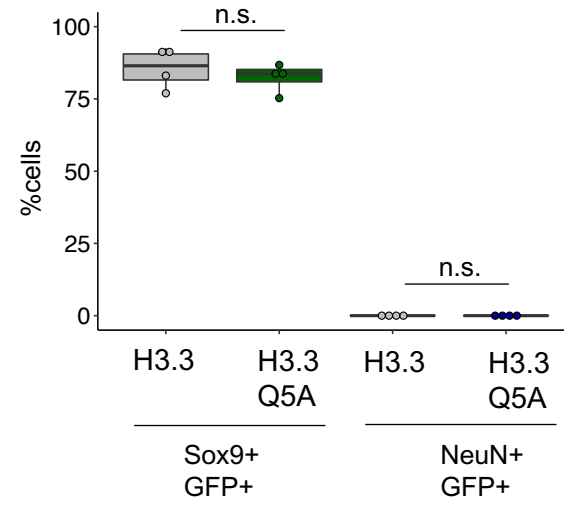**C**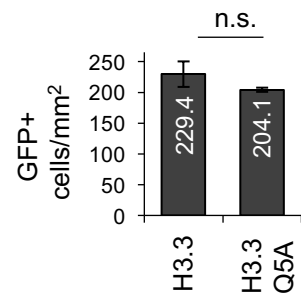**D**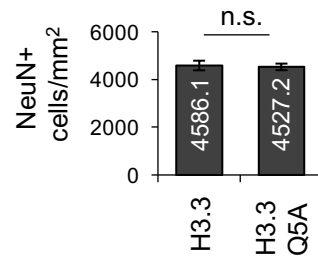**E**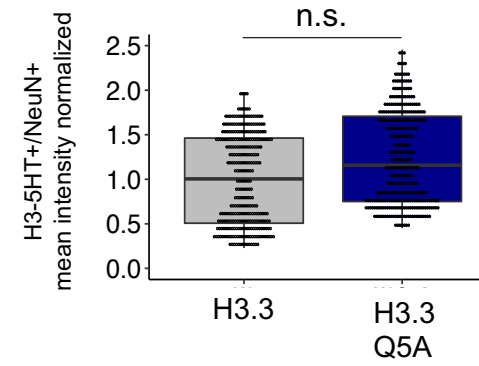

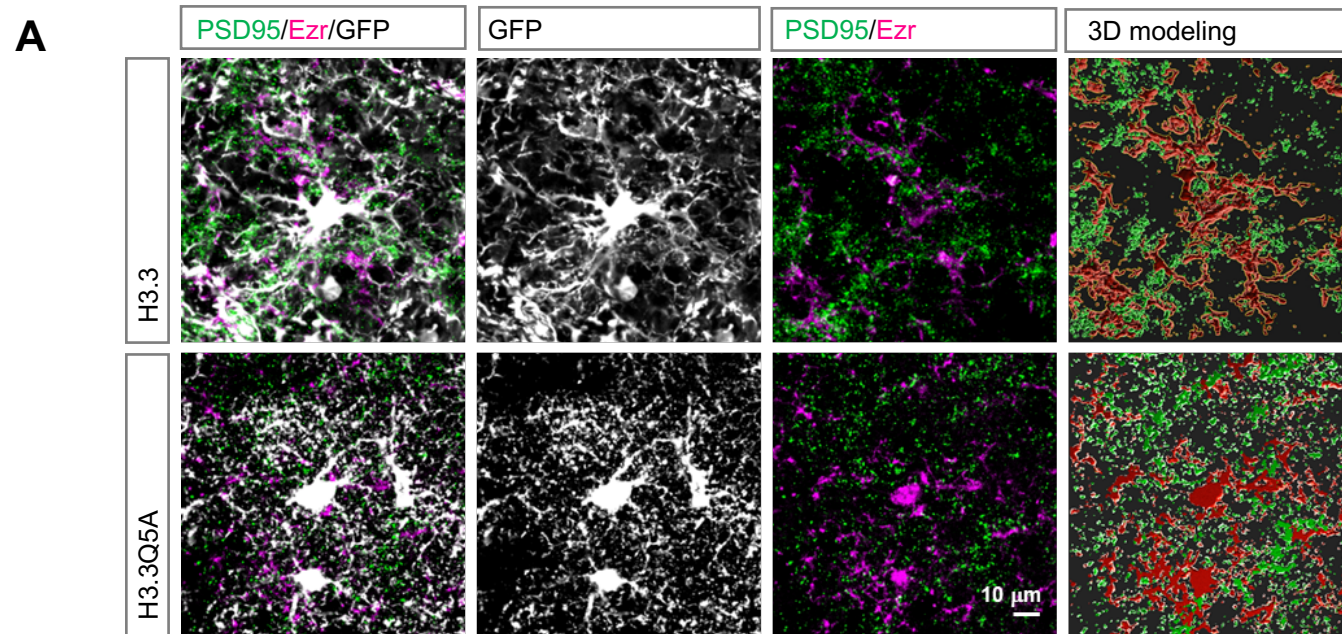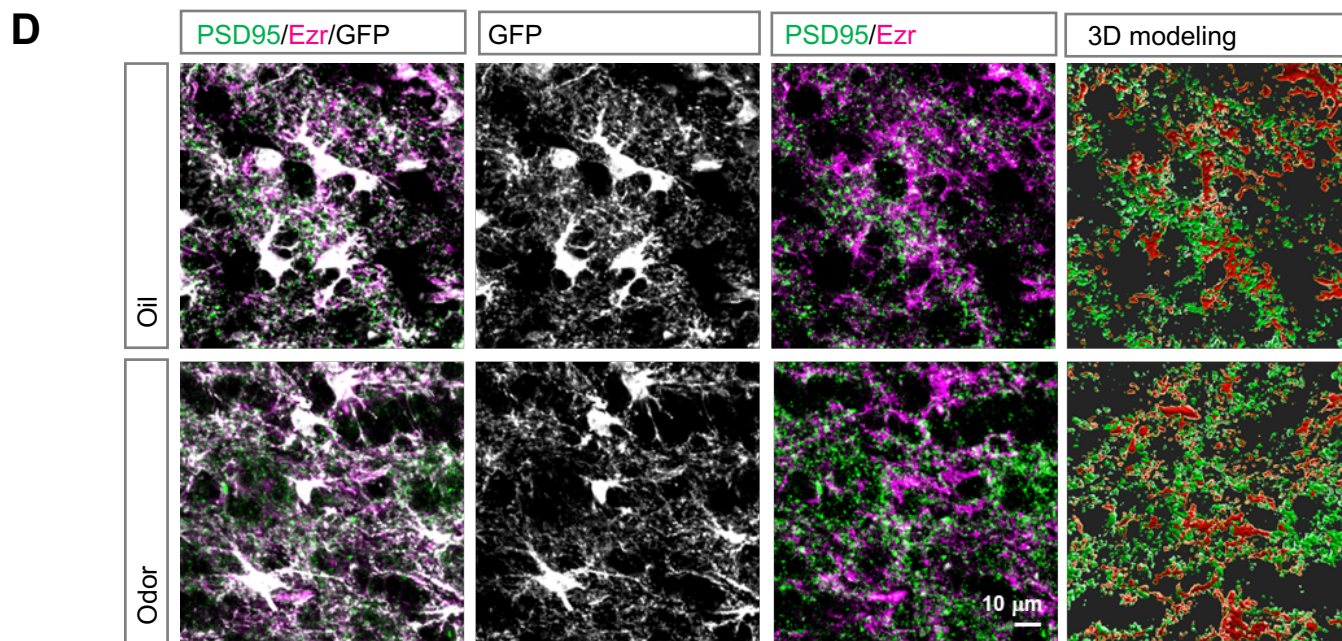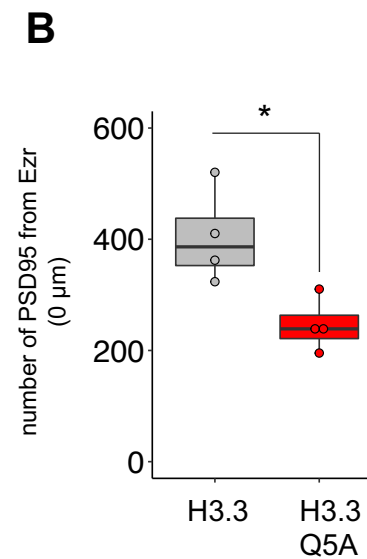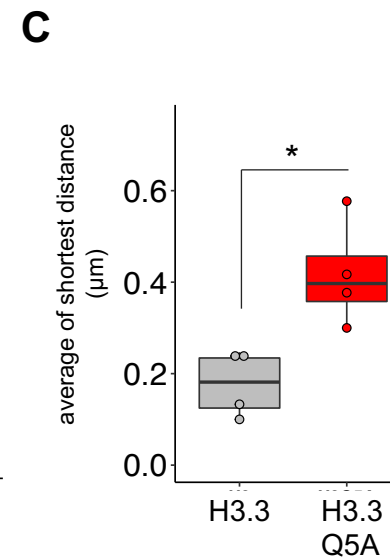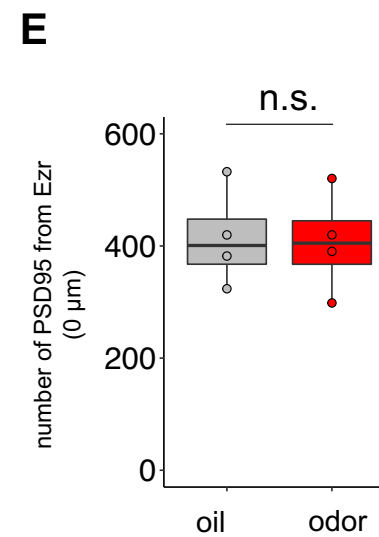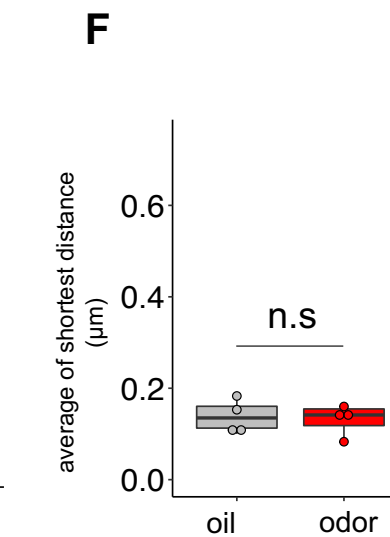

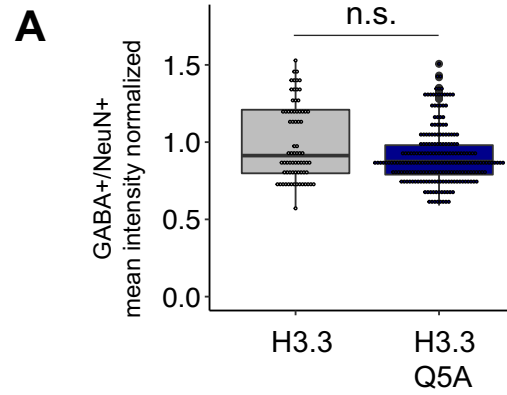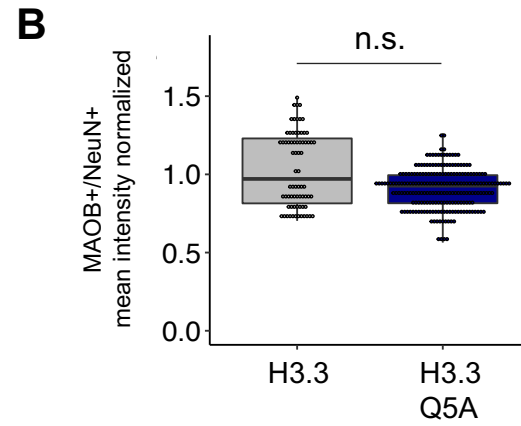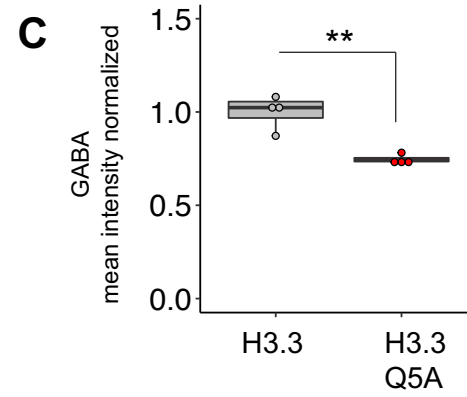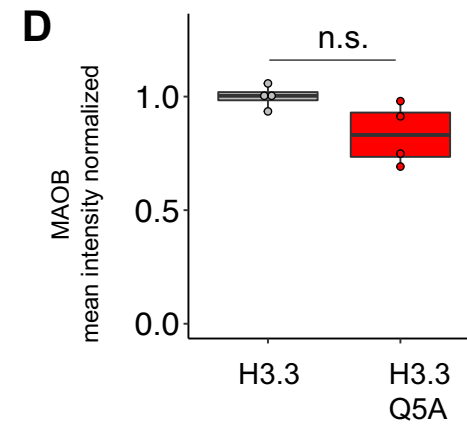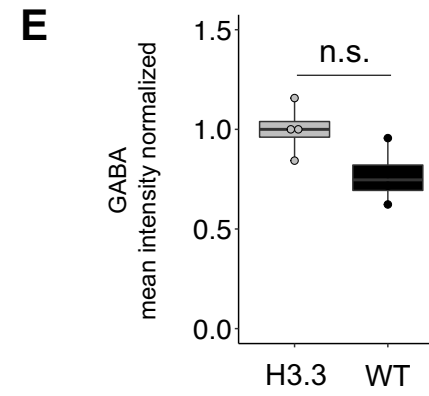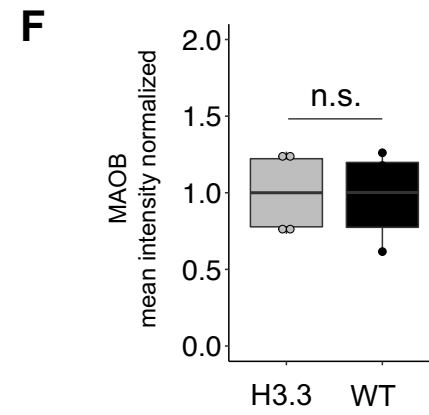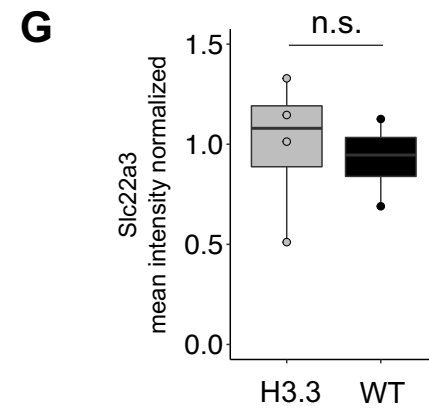

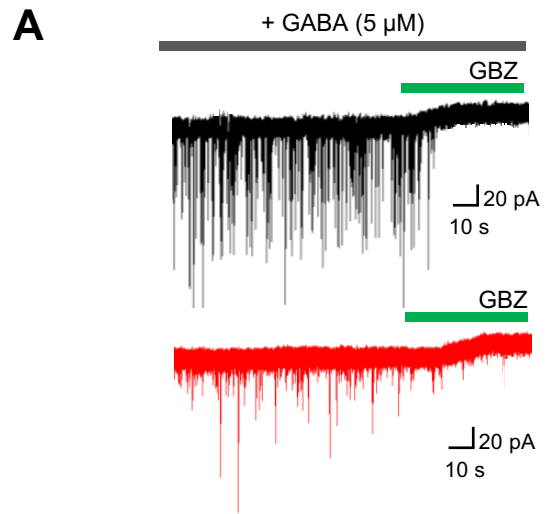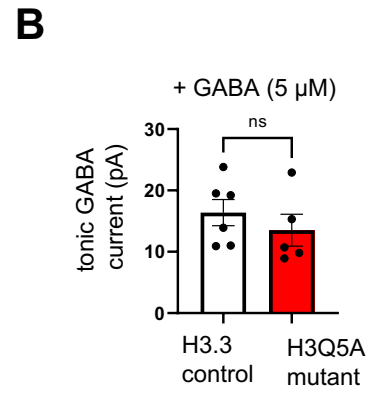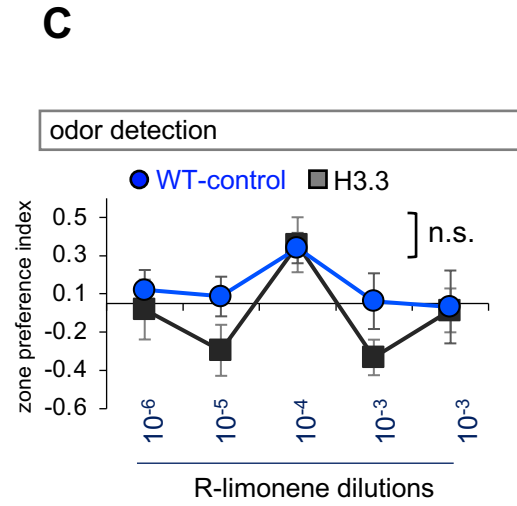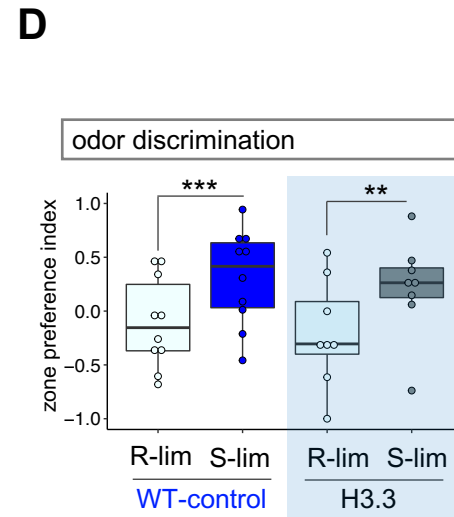

$\mu$
